# Supplementary material for: Contribution of Incorporating the Phosphorus Cycle into TRIPLEX-CNP to Improve the Quantification of Land Carbon Cycle
Source: MDPI journal article supplement (doi:10.3390/land11060778), 2022-05-25
Supplement: s1 [file s1]

**Table S1.** Constants used to calculate the phosphorus cycle

**Table S2.** Percent change in GPP and in the amount of leaf phosphorus (pleaf) in response to changes in four meteorological factors, for different vegetation types

**Table S3.** Fitting of  $r_{pleaf}$  at each site and for five biomes, and model performance for each biome (optimal parameter marked with ※)

**Table S4.** Data used to validate model simulation of gross primary productivity (GPP) and soil organic carbon (SOC)

**Table S5** Data on total biomass taken from global 933 sites and used to validate model performance

**Table S1.** Constants used to calculate the phosphorus cycle

| Parameter    | Unit                  | Values by PFT or Constants |      |      |      |      |       |         |       |      |     |        |        | Explanation                                                                  | Ref.  |
|--------------|-----------------------|----------------------------|------|------|------|------|-------|---------|-------|------|-----|--------|--------|------------------------------------------------------------------------------|-------|
|              |                       | 1                          | 2    | 3    | 4    | 5    | 6     | 7       | 8     | 9    | 10  | 11     | 12     |                                                                              |       |
| $r_{p,leaf}$ | yr                    | 1.0                        | 1.0  | 1.0  | 2.0  | 1.0  | 2.5   | 1.0     | 1.0   | 1.25 | 1.0 | 1.25   | 1.0    | residence time of carbon of plant                                            | [115] |
| $r_{p,wood}$ | yr                    | 1.0                        | 1.0  | 1.0  | 1.0  | 1.0  | 1.0   | 1.0     | 1.0   | 1.0  | 1.0 | 1.0    | 1.0    |                                                                              | [115] |
| $r_{p,root}$ | yr                    | 25.0                       | 25.0 | 25.0 | 50.0 | 50.0 | 100.0 | 100.0   | 100.0 | 5.0  | 5.0 | 1000.0 | 1000.0 |                                                                              | [115] |
| $u_{mvmax}$  | yr <sup>-1</sup>      | 0.1                        | 1.6  | 0.1  | 0.1  | 1.6  | 0.1   | 1.6     | 0.1   | 1.6  | 1.6 | 1.6    | 1.6    | the maximum specific biochemical P mineralization rate                       | [115] |
| $\mu_{sorb}$ | day <sup>-1</sup>     |                            |      |      |      |      |       | 1.8E-05 |       |      |     |        |        | absorbed P pool turnover rate                                                | [69]  |
| $\mu_{ssrb}$ | day <sup>-1</sup>     |                            |      |      |      |      |       | 1.8E-05 |       |      |     |        |        | strong absorbed P pool turnover rate                                         | [69]  |
| $ncostppro$  | g N g P <sup>-1</sup> |                            |      |      |      |      |       | 15.0    |       |      |     |        |        | the critical value of N cost of root uptake above which phosphate production | [69]  |
| $pleach$     | /                     |                            |      |      |      |      |       | 0.04    |       |      |     |        |        | fraction of labile P lost by leaching                                        | [70]  |

PFT, plant function types: 1, tropical broadleaf evergreen tree; 2, tropical broadleaf drought-deciduous trees; 3, warm-temperate broadleaf evergreen tree; 4, temperate conifer evergreen tree; 5, temperate broadleaf cold-deciduous tree; 6, boreal conifer evergreen tree; 7, boreal broadleaf cold-deciduous tree; 8, boreal conifer cold-deciduous tree; 9, evergreen shrub; 10, deciduous shrub; 11, warm grass (C4); 12, cool grass (C3).

**Table S2.** Percent change in GPP and in the amount of leaf phosphorus (pleaf) in response to changes in four meteorological factors, for different vegetation types

| Vegetation Type | cloud cover(%) |              |             |              | near-surface temperature(°C) |              |              |               | precipitation(mm) |               |             |             | vapor pressure(hPa) |               |              |              |
|-----------------|----------------|--------------|-------------|--------------|------------------------------|--------------|--------------|---------------|-------------------|---------------|-------------|-------------|---------------------|---------------|--------------|--------------|
|                 | GPP-20%        | pleaf-20%    | GPP+20%     | pleaf+20%    | GPP-2°                       | pleaf-2°     | GPP+2°       | pleaf+2°      | GPP-20%           | pleaf-20%     | GPP+20%     | pleaf+20%   | GPP-20%             | pleaf-20%     | GPP+20%      | pleaf+20%    |
| TroDBF          | 3.87           | 4.90         | -6.39       | -13.87       | 8.22                         | 4.78         | 4.79         | 8.43          | -7.50             | -8.30         | 4.72        | 1.38        | -10.28              | -9.95         | 10.12        | 8.20         |
| TroEBF          | 0.62           | 0.01         | -1.25       | -1.23        | -6.70                        | 55.40        | -7.37        | -10.62        | -6.41             | -7.13         | 4.99        | 3.49        | -5.19               | -4.73         | 4.59         | 2.64         |
|                 | -23.92         | -35.12       | 25.65       | 80.76        | 22.02                        | 68.11        | 18.59        | -39.61        | -14.98            | -18.97        | 10.65       | 15.33       | -33.61              | -41.03        | 34.50        | 49.90        |
|                 | -30.08         | -19.78       | 27.24       | 54.09        | 23.79                        | 69.96        | 17.52        | -30.21        | -17.50            | -5.30         | 13.02       | 12.15       | -39.45              | -30.52        | 44.06        | 50.18        |
|                 | -6.74          | -10.33       | -12.88      | -1.44        | 8.44                         | 12.15        | 20.59        | -33.50        | -19.36            | -21.19        | 4.90        | 5.78        | -35.00              | -36.31        | 9.43         | 7.60         |
|                 | 5.14           | 4.48         | -5.36       | -12.85       | 10.41                        | 2.53         | 13.53        | -20.30        | -7.77             | -8.82         | 4.85        | 0.34        | -11.93              | -12.13        | 7.72         | -2.02        |
|                 | -8.64          | -11.14       | 15.19       | 33.89        | 25.23                        | 49.10        | 15.57        | -30.70        | -11.10            | -12.91        | 10.25       | 13.18       | -27.13              | -28.98        | 27.89        | 33.96        |
|                 | 10.21          | 8.00         | -10.45      | -16.96       | 4.56                         | 7.06         | 8.72         | -6.38         | -5.03             | -5.42         | 2.96        | 2.54        | -11.92              | -9.30         | 10.52        | 7.72         |
|                 | <b>-7.63</b>   | <b>-9.13</b> | <b>5.45</b> | <b>19.47</b> | <b>12.53</b>                 | <b>21.93</b> | <b>12.06</b> | <b>-24.47</b> | <b>-11.74</b>     | <b>-11.39</b> | <b>7.37</b> | <b>7.54</b> | <b>-23.46</b>       | <b>-23.29</b> | <b>19.81</b> | <b>21.42</b> |
| TemEBF          | 0.14           | -1.18        | 0.02        | 1.94         | 3.66                         | 4.79         | -0.07        | -8.10         | -5.23             | -9.19         | 4.12        | 5.21        | -4.47               | -5.05         | 5.66         | 5.02         |
|                 | -0.52          | -2.44        | 0.69        | 4.79         | 5.82                         | 10.59        | -0.85        | -10.24        | -10.53            | -16.59        | 7.42        | 10.54       | -5.80               | -7.66         | 7.10         | 8.22         |
|                 | -2.19          | -3.63        | 5.67        | 9.64         | 22.56                        | 35.60        | 11.36        | -12.51        | -15.96            | -20.25        | 12.62       | 17.28       | -16.71              | -17.58        | 19.32        | 20.70        |
|                 | 1.06           | 0.53         | -1.02       | -1.28        | 13.86                        | 85.64        | 8.96         | 4.50          | -2.61             | -4.28         | 3.25        | 1.21        | 0.10                | -0.36         | 0.78         | 0.81         |
|                 | -1.26          | -2.71        | 1.54        | 5.54         | 15.84                        | 23.03        | 0.66         | -18.71        | -8.80             | -13.74        | 8.37        | 11.44       | -12.77              | -15.48        | 17.61        | 20.61        |
|                 | 0.64           | -0.72        | 1.06        | 2.52         | 25.71                        | 22.80        | 17.23        | 1.36          | -12.07            | -13.64        | 8.82        | 9.78        | -14.62              | -13.65        | 15.54        | 13.71        |
|                 | <b>-0.35</b>   | <b>-1.69</b> | <b>1.32</b> | <b>3.86</b>  | <b>9.95</b>                  | <b>1.86</b>  | <b>6.21</b>  | <b>-7.28</b>  | <b>-9.20</b>      | <b>-12.95</b> | <b>7.43</b> | <b>9.24</b> | <b>-9.05</b>        | <b>-9.96</b>  | <b>11.00</b> | <b>11.51</b> |
| TemDBF          | -1.79          | -2.83        | 1.82        | 5.69         | 20.18                        | 22.15        | 13.85        | -16.85        | -21.94            | -24.29        | 19.96       | 22.81       | -17.86              | -18.02        | 26.60        | 24.81        |

|        |              |              |              |              |             |             |             |              |              |              |             |             |               |               |              |             |
|--------|--------------|--------------|--------------|--------------|-------------|-------------|-------------|--------------|--------------|--------------|-------------|-------------|---------------|---------------|--------------|-------------|
|        | 1.79         | 2.18         | -1.96        | -5.31        | -0.65       | -6.83       | -1.91       | -1.03        | -3.30        | -1.35        | 1.04        | -3.23       | -8.11         | -5.63         | 5.95         | 0.01        |
|        | 1.50         | 0.76         | -2.22        | -2.62        | -2.09       | -6.43       | 0.58        | -8.11        | -9.62        | -10.46       | 6.01        | 5.39        | -13.31        | -12.88        | 12.32        | 9.77        |
|        | 1.45         | -0.85        | -1.87        | 0.67         | 4.50        | 10.38       | 8.67        | -8.10        | -4.02        | -10.97       | 3.52        | 6.41        | -9.09         | -11.37        | 10.24        | 11.71       |
|        | 0.85         | -0.96        | -0.90        | 1.74         | 3.56        | 2.23        | 15.28       | -0.23        | -9.64        | -11.61       | 8.13        | 8.87        | -13.06        | -12.06        | 15.48        | 13.27       |
|        | 0.09         | -2.02        | -0.27        | 3.82         | 8.67        | 15.17       | 14.89       | -9.16        | -13.33       | -18.56       | 8.28        | 11.52       | -16.09        | -17.41        | 17.57        | 18.46       |
|        | 0.97         | 3.01         | -1.28        | -6.29        | -2.19       | -7.59       | 0.42        | 6.63         | -2.44        | 2.36         | 0.64        | -4.66       | -8.84         | -4.13         | 7.84         | 2.56        |
|        | -0.82        | 0.30         | 1.83         | 0.49         | -2.91       | -5.73       | 2.61        | 5.40         | -5.92        | 2.22         | 2.38        | -7.82       | -10.49        | -1.90         | 9.15         | -2.04       |
|        |              |              |              |              | -           | -           |             |              |              |              |             |             |               |               |              |             |
|        | 7.93         | 9.00         | -15.50       | -26.81       | 11.16       | 16.04       | -4.61       | 1.24         | 1.54         | 5.26         | -0.44       | -6.49       | -6.10         | -0.10         | 2.91         | -4.86       |
|        | 0.57         | -1.21        | -0.63        | 2.27         | 22.20       | 14.14       | 19.34       | 4.94         | -10.46       | -11.93       | 7.58        | 8.45        | -13.90        | -12.40        | 16.49        | 13.89       |
|        | 1.62         | 3.59         | -1.78        | -7.18        | -3.99       | -9.44       | 1.78        | 9.23         | -1.61        | -0.69        | 0.95        | -1.35       | -8.78         | -4.25         | 7.03         | 2.99        |
|        | -2.31        | -1.04        | 0.20         | 1.04         | -0.68       | -4.24       | 1.91        | 1.46         | -2.58        | -0.39        | 0.24        | -2.09       | -10.37        | -6.71         | 7.46         | 2.75        |
|        |              |              |              |              |             |             | -           |              |              |              |             |             |               |               |              |             |
|        | -3.56        | -5.35        | 3.05         | 10.31        | 6.65        | 5.41        | 12.76       | -18.77       | -12.42       | -12.33       | 8.69        | 5.42        | -14.03        | -11.24        | 14.25        | 7.49        |
|        |              |              |              |              |             |             | -           |              |              |              |             |             |               |               |              |             |
|        | -6.27        | -8.60        | 4.35         | 14.61        | 6.92        | 7.32        | 18.99       | -32.66       | -14.81       | -16.49       | 7.95        | 9.01        | -30.27        | -31.46        | 21.79        | 18.02       |
|        |              |              |              |              |             | -           | -           |              |              |              |             |             |               |               |              |             |
|        | -4.56        | -3.15        | 4.81         | 6.37         | 1.80        | 14.40       | 15.98       | 23.44        | -11.08       | -4.00        | 6.58        | -0.78       | -15.64        | -1.35         | 14.93        | -2.05       |
|        | <b>-0.17</b> | <b>-0.48</b> | <b>-0.69</b> | <b>-0.08</b> | <b>3.39</b> | <b>0.41</b> | <b>1.67</b> | <b>-2.84</b> | <b>-8.11</b> | <b>-7.55</b> | <b>5.43</b> | <b>3.43</b> | <b>-13.06</b> | <b>-10.06</b> | <b>12.67</b> | <b>7.78</b> |
|        | -1.22        | -0.56        | 1.18         | 2.83         | 7.10        | 19.18       | 17.40       | -17.01       | -22.21       | -24.57       | 18.92       | 23.88       | -3.22         | -1.92         | 3.66         | 3.44        |
|        |              |              |              |              |             |             | -           |              |              |              |             |             |               |               |              |             |
|        | -9.14        | -16.07       | 8.18         | 33.06        | 20.42       | -6.76       | 13.66       | -28.04       | -3.60        | -13.45       | 5.50        | 11.92       | -18.67        | -24.36        | 29.44        | 41.04       |
|        | 3.62         | 3.30         | -4.12        | -8.50        | 8.66        | 2.30        | 4.17        | -8.10        | -4.97        | -5.31        | 2.71        | -3.29       | -12.84        | -11.28        | 12.46        | 2.96        |
|        | -0.65        | -1.34        | 0.50         | 2.46         | 5.15        | 5.70        | -5.92       | -8.17        | -2.38        | -2.84        | 2.73        | 3.80        | -10.51        | -9.13         | 10.39        | 8.71        |
|        | -6.93        | -0.16        | 7.44         | -1.08        | 1.87        | 33.06       | -9.66       | -17.66       | -30.83       | -39.16       | 28.31       | 37.15       | -7.87         | -12.95        | 11.57        | 22.74       |
|        |              |              |              |              |             |             | -           |              |              |              |             |             |               |               |              |             |
|        | -7.43        | -2.39        | 8.09         | 3.22         | 4.82        | 45.42       | 10.68       | -37.09       | -33.23       | -48.61       | 29.74       | 41.15       | -11.48        | -21.98        | 17.97        | 42.87       |
|        |              |              |              |              |             | -           |             |              |              |              |             |             |               |               |              |             |
|        | -0.59        | -0.83        | 7.87         | 5.75         | 12.46       | 11.65       | 13.16       | 2.11         | -2.47        | -5.12        | 3.16        | 2.94        | -9.27         | -8.31         | 10.07        | 7.84        |
|        |              |              |              |              | -           |             |             |              |              |              |             |             |               |               |              |             |
|        | 1.22         | 1.76         | -1.55        | -3.59        | 13.61       | 13.35       | 1.88        | -19.56       | -2.87        | -8.44        | 2.64        | -8.07       | -11.06        | -8.06         | 10.27        | 6.61        |
| TemENF |              |              |              |              |             |             |             |              |              |              |             |             |               |               |              |             |

|    |             |             |             |              |              |             |             |              |              |              |             |             |               |              |              |             |
|----|-------------|-------------|-------------|--------------|--------------|-------------|-------------|--------------|--------------|--------------|-------------|-------------|---------------|--------------|--------------|-------------|
|    |             |             |             |              | -            | 160.9       |             |              |              |              |             |             |               |              |              |             |
|    | 1.45        | 2.83        | -1.61       | -5.82        | 15.93        | 7           | 4.31        | 9.76         | -2.14        | 2.23         | 0.35        | -3.62       | -9.36         | -3.26        | 8.69         | 3.62        |
|    | -1.19       | 0.63        | 0.45        | -2.18        | 5.18         | -7.79       | -0.70       | 8.09         | -5.44        | -2.63        | 3.97        | 1.88        | -12.02        | -2.75        | 10.91        | 2.48        |
|    |             |             |             |              |              | -           | -           |              |              |              |             |             |               |              |              |             |
|    | 2.02        | 2.80        | -2.30       | -6.17        | -6.92        | 10.86       | 11.64       | -5.78        | -2.33        | 0.78         | 0.32        | -3.47       | -8.52         | -2.98        | 5.18         | -0.01       |
|    | 5.41        | 4.55        | -6.32       | -9.62        | -9.55        | -6.89       | 5.77        | 6.54         | 0.54         | 5.39         | -1.81       | -2.52       | -11.05        | -6.98        | 6.16         | 2.99        |
|    |             |             |             |              |              | -           |             |              |              |              |             |             |               |              |              |             |
|    | 1.53        | 3.52        | -1.74       | -7.19        | -4.71        | 10.24       | 2.34        | 10.17        | -1.41        | -0.51        | 0.91        | -0.78       | -9.00         | -4.32        | 7.28         | 3.05        |
|    |             |             |             |              | -            | -           | -           |              |              |              |             |             |               |              |              |             |
|    | 3.54        | 6.40        | -5.16       | -12.89       | 15.90        | 46.67       | 14.82       | 6.23         | 1.11         | 11.69        | -12.85      | -6.25       | -12.07        | -4.54        | 8.65         | 4.27        |
|    |             |             |             |              |              | -           |             |              |              |              |             |             |               |              |              |             |
|    | 3.19        | 4.66        | -4.00       | -10.51       | -5.53        | 10.79       | 2.26        | 5.84         | -2.13        | 0.34         | 0.21        | -3.77       | -8.31         | -3.65        | 5.36         | -1.03       |
|    |             |             |             |              |              | -           |             |              |              |              |             |             |               |              |              |             |
|    | 2.74        | 5.18        | -3.32       | -10.59       | -5.05        | 10.60       | 3.83        | 13.71        | -0.06        | 5.43         | -0.06       | -5.63       | -7.64         | 0.34         | 5.76         | -1.67       |
|    | 2.74        | 2.30        | -3.14       | -4.76        | -4.66        | -1.33       | 12.78       | -81.54       | 1.03         | -12.91       | 0.39        | 1.16        | -7.56         | -19.78       | 9.32         | 11.53       |
|    | <b>0.02</b> | <b>0.98</b> | <b>0.03</b> | <b>-2.09</b> | <b>-0.95</b> | <b>9.20</b> | <b>0.05</b> | <b>-9.44</b> | <b>-6.67</b> | <b>-8.10</b> | <b>5.01</b> | <b>5.09</b> | <b>-10.03</b> | <b>-8.58</b> | <b>10.18</b> | <b>9.50</b> |
| BF |             |             |             |              |              |             | -           |              |              |              |             |             |               |              |              |             |
|    | -5.04       | -6.99       | 3.20        | 12.04        | 8.45         | 12.39       | 19.98       | -31.61       | -23.62       | -26.92       | 12.93       | 15.13       | -31.69        | -33.63       | 20.53        | 20.77       |
|    |             |             |             |              |              | -           |             |              |              |              |             |             |               |              |              |             |
|    | 0.76        | 2.11        | -2.54       | -5.46        | -3.68        | 12.11       | -0.66       | 10.34        | -3.05        | -1.22        | 1.33        | -0.35       | -9.37         | 0.61         | 6.33         | -0.20       |
|    |             |             |             |              |              | -           |             |              |              |              |             |             |               |              |              |             |
|    | -7.16       | -6.42       | 5.14        | 13.38        | 1.35         | 31.58       | 17.31       | -30.95       | -27.09       | -21.31       | 11.73       | 15.65       | -20.60        | -30.20       | 16.79        | 36.58       |
|    | 0.53        | 2.62        | -0.79       | -4.38        | -6.93        | 13.89       | -1.05       | -12.68       | -7.49        | -2.92        | 1.47        | 0.94        | -8.65         | -19.73       | 6.64         | 23.74       |
|    |             |             |             |              |              | -           |             |              |              |              |             |             |               |              |              |             |
|    | -5.33       | -6.71       | 2.11        | 11.51        | -3.05        | 26.64       | 14.43       | -29.79       | -23.99       | -20.83       | 6.52        | 12.38       | -17.99        | -29.98       | 11.64        | 32.28       |
|    |             |             |             |              | -            |             |             |              |              |              |             |             |               |              |              |             |
|    | 1.47        | 2.87        | -2.40       | -7.19        | 12.38        | 16.50       | 0.40        | -18.67       | -8.51        | -6.23        | 1.70        | 4.94        | -11.95        | -24.46       | 5.74         | 25.98       |
|    | -0.07       | 0.94        | -1.22       | -3.89        | -9.66        | 19.11       | -4.31       | -22.69       | -11.97       | -9.70        | 3.45        | 5.54        | -13.64        | -26.11       | 7.76         | 26.58       |
|    |             |             |             |              |              | -           |             |              |              |              |             |             |               |              |              |             |
|    | 0.67        | 1.50        | -2.02       | -4.69        | -2.79        | 17.25       | -2.22       | 0.30         | -6.37        | -5.64        | 1.53        | -0.49       | -10.38        | -7.58        | 6.85         | 2.48        |

|       |              |              |             |             |              |              |              |               |               |               |             |             |               |               |              |              |
|-------|--------------|--------------|-------------|-------------|--------------|--------------|--------------|---------------|---------------|---------------|-------------|-------------|---------------|---------------|--------------|--------------|
|       |              |              |             |             | -            |              |              |               |               |               |             |             |               |               |              |              |
|       | 0.21         | 4.72         | -1.22       | -11.53      | 13.53        | 18.73        | -0.33        | -26.35        | -3.06         | 7.27          | 2.12        | -1.17       | -12.38        | 0.36          | 9.67         | 0.22         |
|       |              |              |             |             |              |              | -            |               |               |               |             |             |               |               |              |              |
|       | -9.49        | -6.36        | 8.07        | 9.65        | 20.89        | 7.74         | 17.28        | -10.45        | -25.78        | -23.75        | 23.82       | 18.58       | -20.50        | -18.05        | 31.33        | 22.47        |
|       |              |              |             |             |              |              | -            |               |               |               |             |             |               |               |              |              |
|       | -3.17        | -1.75        | -1.05       | 1.73        | -9.87        | 23.10        | 12.96        | -37.52        | -15.75        | -15.09        | 4.81        | 5.62        | -23.59        | -40.26        | 8.71         | 30.98        |
|       | <b>-2.42</b> | <b>-1.23</b> | <b>0.66</b> | <b>1.02</b> | <b>-2.84</b> | <b>12.76</b> | <b>-8.19</b> | <b>-19.10</b> | <b>-14.24</b> | <b>-11.49</b> | <b>6.49</b> | <b>6.98</b> | <b>-16.43</b> | <b>-20.82</b> | <b>12.00</b> | <b>20.17</b> |
| Grass | -1.09        | -2.64        | 1.10        | 4.80        | 15.58        | 15.29        | -0.76        | -17.25        | -13.55        | -20.31        | 12.65       | 17.77       | -13.63        | -16.28        | 16.67        | 19.42        |
|       | -0.68        | -2.21        | 0.65        | 4.40        | 15.01        | 24.30        | 13.44        | -13.07        | -17.88        | -22.17        | 16.64       | 21.11       | -15.86        | -16.96        | 21.51        | 23.87        |
|       | -5.68        | -8.51        | 6.01        | 17.94       | 25.37        | 43.99        | 7.12         | -33.66        | -18.07        | -23.15        | 10.78       | 14.58       | -18.10        | -21.67        | 25.11        | 31.30        |
|       | -11.75       | -14.62       | 12.28       | 30.55       | 24.25        | 36.69        | -1.32        | -32.70        | -20.61        | -23.77        | 6.12        | 7.26        | -12.23        | -13.78        | 17.72        | 20.35        |
|       | 2.18         | 1.66         | -5.43       | -6.86       | 7.18         | 9.58         | -6.58        | -14.45        | -2.05         | -2.38         | 2.73        | 3.08        | -5.56         | -2.94         | 4.43         | 2.49         |
|       |              |              |             |             |              |              | -            |               |               |               |             |             |               |               |              |              |
|       | -4.44        | -7.03        | 3.50        | 12.71       | -4.41        | 0.19         | 19.19        | -15.44        | -16.63        | -21.56        | 8.76        | 9.38        | -5.45         | -4.86         | 7.34         | 7.30         |
|       | -2.10        | -3.80        | 2.24        | 7.83        | 8.76         | 16.77        | 22.16        | -13.79        | -23.72        | -27.25        | 20.78       | 25.85       | -6.76         | -7.30         | 9.34         | 10.06        |
|       | -1.32        | -2.97        | 1.41        | 6.08        | 8.74         | 16.51        | 23.53        | -11.52        | -20.71        | -24.47        | 17.08       | 21.13       | -7.55         | -8.10         | 10.28        | 10.86        |
|       | -0.61        | -2.75        | 0.64        | 5.58        | 16.37        | 24.37        | 11.62        | -12.85        | -20.71        | -23.93        | 18.33       | 23.65       | -16.90        | -17.74        | 22.32        | 24.09        |
|       | -0.39        | -2.40        | 0.52        | 4.96        | 14.91        | 22.42        | 19.36        | -11.03        | -21.70        | -25.33        | 18.43       | 23.04       | -15.90        | -16.78        | 21.25        | 22.72        |
|       | -0.20        | -2.16        | 0.30        | 5.06        | 12.98        | 23.32        | 19.77        | -10.06        | -19.84        | -23.16        | 18.19       | 23.82       | -13.69        | -14.64        | 18.11        | 19.30        |
|       | 0.00         | -1.91        | 0.12        | 4.31        | 12.32        | 23.09        | 20.12        | -10.02        | -20.00        | -23.20        | 17.68       | 23.74       | -13.53        | -14.45        | 17.71        | 18.62        |
|       |              |              |             |             |              |              | -            |               |               |               |             |             |               |               |              |              |
|       | -14.68       | -16.26       | 19.16       | 30.58       | -2.38        | 3.04         | 22.56        | -28.79        | -32.00        | -35.15        | 35.27       | 34.27       | -3.64         | -3.05         | 5.06         | 4.15         |
|       | -0.31        | -1.63        | 0.30        | 3.19        | 19.95        | 28.78        | 19.23        | -6.34         | -17.81        | -19.96        | 16.01       | 18.00       | -10.38        | -10.98        | 14.15        | 14.96        |
|       | 0.46         | -0.38        | -0.89       | 0.19        | 5.32         | 9.98         | 18.66        | -4.75         | -5.44         | -7.23         | 3.06        | 3.72        | -11.53        | -10.20        | 10.94        | 9.46         |
|       | -9.45        | -9.34        | 13.39       | 20.44       | 9.02         | 14.29        | 17.63        | -4.04         | -31.72        | -35.15        | 34.74       | 37.94       | -8.73         | -8.16         | 11.26        | 10.21        |
|       | -0.94        | -3.00        | 0.22        | 5.08        | 11.47        | 16.47        | 0.19         | -14.24        | -16.70        | -19.31        | 8.61        | 10.20       | -21.68        | -23.04        | 21.96        | 22.97        |
|       | -7.12        | -6.10        | 10.40       | 12.37       | 11.07        | 8.71         | 2.57         | -10.83        | -24.27        | -25.88        | 24.04       | 23.91       | -10.22        | -8.92         | 13.35        | 11.08        |
|       | -2.11        | -3.06        | 2.24        | 6.02        | 18.72        | 15.90        | 13.33        | -7.70         | -21.97        | -23.08        | 19.87       | 20.18       | -16.65        | -16.15        | 23.83        | 21.71        |
|       |              |              |             |             | -            | -            | -            |               |               |               |             |             |               |               |              |              |
|       | 2.54         | 4.50         | -3.40       | -9.80       | 11.14        | 11.43        | 13.22        | -8.64         | 0.65          | 6.14          | -0.85       | -5.26       | -10.06        | -6.62         | 7.99         | 2.57         |
|       | 3.38         | 3.82         | -4.07       | -7.72       | -7.43        | 12.67        | 11.93        | -80.17        | 0.61          | 3.61          | -0.65       | -3.82       | -10.59        | -7.58         | 6.10         | 3.48         |

|       |              |              |             |             |              |              |             |               |               |               |              |              |               |               |              |              |
|-------|--------------|--------------|-------------|-------------|--------------|--------------|-------------|---------------|---------------|---------------|--------------|--------------|---------------|---------------|--------------|--------------|
|       |              |              |             |             |              | -            |             |               |               |               |              |              |               |               |              |              |
|       | 5.49         | 7.57         | -8.56       | -18.09      | -6.55        | 13.14        | -6.85       | 0.85          | -0.51         | 5.04          | -0.48        | -5.87        | -6.75         | 0.48          | 4.44         | -3.54        |
|       | 6.38         | 5.66         | -8.75       | -12.37      | -9.77        | -9.78        | -0.79       | -7.58         | 1.14          | 5.46          | -1.23        | -5.95        | -9.64         | -6.46         | 5.71         | 2.02         |
|       |              |              |             |             |              | -            | -           |               |               |               |              |              |               |               |              |              |
|       | 3.03         | 4.43         | -4.71       | -10.27      | -6.10        | 11.40        | 17.57       | -9.46         | -2.17         | 2.69          | 0.40         | -4.95        | -8.23         | -1.95         | 5.89         | -1.35        |
|       |              |              |             |             |              | -            | -           |               |               |               |              |              |               |               |              |              |
|       | 4.39         | 5.45         | -6.00       | -12.74      | -5.02        | 11.62        | 11.07       | -4.52         | -2.72         | 1.58          | 0.21         | -4.38        | -7.12         | -1.32         | 4.90         | -2.07        |
|       | 3.87         | 5.16         | -5.20       | -11.83      | -8.73        | -7.78        | -5.70       | -1.37         | -1.31         | 2.07          | -0.49        | -5.09        | -7.32         | -2.97         | 4.84         | -1.11        |
|       | 1.51         | 2.81         | -3.30       | -7.78       | -2.49        | -9.53        | -1.76       | 3.00          | -3.46         | -0.54         | 1.00         | -3.68        | -9.09         | -3.25         | 6.01         | -0.90        |
|       |              |              |             |             |              | -            | -           |               |               |               |              |              |               |               |              |              |
|       | 1.18         | 0.40         | -5.04       | -4.95       | -1.30        | -6.34        | 16.66       | -12.60        | -5.62         | -4.44         | 1.94         | -0.21        | -12.00        | -7.53         | 7.33         | 3.29         |
|       |              |              |             |             |              | -            | -           |               |               |               |              |              |               |               |              |              |
|       | -10.55       | -8.17        | 14.37       | 14.23       | 13.67        | 6.35         | 20.67       | -21.30        | -26.87        | -24.77        | 28.97        | 23.07        | -14.73        | -11.56        | 22.39        | 15.30        |
|       |              |              |             |             |              | -            | -           |               |               |               |              |              |               |               |              |              |
|       | -2.72        | -2.99        | 3.16        | 6.55        | -3.25        | -3.65        | 23.11       | -17.47        | -5.11         | -4.30         | 3.38         | 2.06         | -12.79        | -9.04         | 9.81         | 5.76         |
|       | <b>-1.39</b> | <b>-2.02</b> | <b>1.22</b> | <b>3.35</b> | <b>6.07</b>  | <b>9.60</b>  | <b>1.76</b> | <b>-14.39</b> | <b>-13.69</b> | <b>-14.46</b> | <b>11.40</b> | <b>11.62</b> | <b>-11.21</b> | <b>-9.79</b>  | <b>12.59</b> | <b>10.94</b> |
| Sava  | 0.55         | 0.51         | -0.45       | -1.29       | 7.67         | 0.95         | 11.05       | -14.44        | -7.11         | -3.60         | 7.08         | 2.77         | -10.56        | -5.81         | 12.19        | 7.06         |
|       | -1.45        | -2.35        | 1.45        | 4.69        | 12.64        | 17.98        | 22.14       | -13.35        | -22.41        | -25.40        | 22.13        | 25.37        | -9.48         | -10.03        | 13.26        | 13.46        |
|       | -1.48        | -2.71        | 1.50        | 5.34        | 15.55        | 20.13        | 5.13        | -13.15        | -19.00        | -21.29        | 17.85        | 22.54        | -14.39        | -15.64        | 20.07        | 21.89        |
|       | 0.33         | -1.62        | -1.35       | 1.88        | 10.31        | 18.45        | 13.25       | -15.21        | -16.79        | -20.41        | 12.57        | 16.19        | -11.11        | -11.33        | 13.81        | 14.12        |
|       | 1.36         | -0.66        | -2.31       | -0.25       | 9.71         | 17.68        | 13.18       | -14.54        | -14.05        | -17.23        | 11.49        | 14.35        | -11.27        | -11.48        | 13.64        | 13.78        |
|       | 3.33         | 1.71         | -4.60       | -5.43       | 8.68         | 15.73        | 12.53       | -12.25        | -12.44        | -14.92        | 8.87         | 10.13        | -11.89        | -11.76        | 13.58        | 12.82        |
|       | 3.28         | 0.92         | -5.99       | -5.27       | 8.91         | 15.04        | 10.45       | -12.84        | -10.40        | -13.48        | 7.27         | 10.45        | -13.79        | -13.11        | 14.53        | 12.95        |
|       | -11.66       | -16.95       | 14.07       | 36.90       | 21.65        | 43.45        | 3.13        | -29.36        | -11.94        | -16.14        | 5.46         | 6.92         | -24.98        | -28.58        | 39.92        | 42.33        |
|       |              |              |             |             |              | -            | -           |               |               |               |              |              |               |               |              |              |
|       | 6.64         | 4.82         | -7.39       | -12.49      | 10.38        | 11.96        | 12.35       | -19.86        | -3.53         | -4.67         | 1.97         | 2.17         | -10.33        | -11.94        | 9.30         | 8.25         |
|       | -6.20        | -7.66        | 5.03        | 14.27       | 15.22        | 19.71        | 1.87        | -22.40        | -22.31        | -23.04        | 19.74        | 21.69        | -11.90        | -11.49        | 16.37        | 15.00        |
|       | -1.54        | -2.30        | 1.09        | 4.28        | 12.17        | 17.15        | 6.06        | -15.61        | -18.82        | -19.91        | 13.65        | 15.02        | -10.71        | -9.19         | 13.44        | 12.40        |
|       | <b>-0.62</b> | <b>-2.39</b> | <b>0.09</b> | <b>3.88</b> | <b>12.08</b> | <b>18.02</b> | <b>7.86</b> | <b>-16.64</b> | <b>-14.44</b> | <b>-16.37</b> | <b>11.64</b> | <b>13.42</b> | <b>-12.76</b> | <b>-12.76</b> | <b>16.37</b> | <b>15.82</b> |
| Shrub | -1.27        | -2.54        | 1.20        | 4.74        | 7.50         | 16.57        | 16.93       | -16.28        | -21.87        | -24.08        | 20.72        | 24.42        | -3.52         | -3.19         | 3.79         | 3.48         |

|  |              |              |             |             |             |             |              |               |               |               |              |              |               |               |              |              |
|--|--------------|--------------|-------------|-------------|-------------|-------------|--------------|---------------|---------------|---------------|--------------|--------------|---------------|---------------|--------------|--------------|
|  | 4.32         | 6.36         | -4.40       | -13.40      | 4.27        | -3.10       | 5.37         | 3.27          | 10.19         | 9.20          | -1.07        | -5.94        | -6.66         | -1.70         | 4.62         | -2.74        |
|  | -2.03        | -3.64        | 2.18        | 7.58        | 8.88        | 16.90       | 12.01        | -13.33        | -21.72        | -25.27        | 19.29        | 23.45        | -6.79         | -7.24         | 9.52         | 10.13        |
|  |              |              |             |             |             |             | -            |               |               |               |              |              |               |               |              |              |
|  | -9.46        | -7.48        | 11.88       | 16.49       | 24.96       | 21.82       | 10.03        | -22.03        | -24.68        | -26.44        | 20.94        | 24.86        | -22.07        | -19.18        | 23.44        | 21.92        |
|  | 0.47         | -1.17        | -0.51       | 2.21        | 6.83        | 10.44       | 21.93        | -4.58         | -10.05        | -12.76        | 7.47         | 8.47         | -14.20        | -13.70        | 15.95        | 14.43        |
|  | -6.00        | -0.58        | 7.20        | -0.47       | -2.70       | 19.05       | -9.47        | -57.50        | -22.78        | -29.76        | 21.73        | 24.16        | -10.41        | -20.27        | 14.94        | 31.55        |
|  |              |              |             |             |             |             | -            |               |               |               |              |              |               |               |              |              |
|  | -2.24        | -0.68        | -0.97       | -2.23       | -8.80       | 7.13        | 14.23        | -28.17        | -16.84        | -19.04        | 4.82         | 5.09         | -18.07        | -32.35        | 8.39         | 28.64        |
|  |              |              |             |             | -           | -           | -            |               |               |               |              |              |               |               |              |              |
|  | -10.35       | -4.02        | 0.66        | -3.29       | 12.30       | 23.71       | 10.98        | 0.41          | -22.75        | -18.76        | 5.96         | -0.16        | -25.37        | -18.41        | 10.17        | -3.08        |
|  |              |              |             |             |             |             | -            |               |               |               |              |              |               |               |              |              |
|  | -14.72       | -6.69        | 17.30       | 13.49       | 16.76       | 9.15        | 18.16        | -9.93         | -22.36        | -17.53        | 24.57        | 17.94        | -23.58        | -16.98        | 46.34        | 31.73        |
|  | <b>-4.59</b> | <b>-2.27</b> | <b>3.84</b> | <b>2.79</b> | <b>5.04</b> | <b>8.25</b> | <b>-0.74</b> | <b>-16.46</b> | <b>-16.98</b> | <b>-18.27</b> | <b>13.83</b> | <b>13.59</b> | <b>-14.52</b> | <b>-14.78</b> | <b>15.24</b> | <b>15.12</b> |

TroEBF, tropical evergreen broadleaf forest; TroDBF, tropical deciduous broadleaf forest; TemEBF, temperate evergreen broadleaf forest; TemENF, temperate evergreen needleleaf forest; TemDBF, temperate deciduous broadleaf forest; BF, boreal forest; Grass, grassland; Sava, savanna; Shrub, shrubland. The mean values of each vegetation type are reported in the final row of each group.



**Table S3.** Fitting of  $r_{pleaf}$  at each site and for five biomes, and model performance for each biome (optimal parameter marked with ※)

| No. | $r_{pleaf}$ | $r_{pleaf}$ Biome | Biome            | R <sup>2</sup> | RMSE | D    | NO  | Latitude (°) | Longitude (°) | Site name       | Country     |
|-----|-------------|-------------------|------------------|----------------|------|------|-----|--------------|---------------|-----------------|-------------|
| 1   | 1.00        | 0.783※            | Tropical Forest  | 0.65           | 4.11 | 0.05 | 36  | 23.1733      | 112.5361      | Dinghushan      | China       |
| 2   | 0.40        |                   |                  | 0.26           | 6.53 | 0.02 | 48  | 9.3181       | -79.6346      | Sardinilla      | Panama      |
| 3   | 0.95        |                   |                  | 0.24           | 7.93 | 0.01 | 228 | 5.2685       | -2.6942       | Ankasa          | Ghana       |
| 4   | 0.50        | 0.603※            | Temperate Forest | 0.87           | 7.25 | 0.02 | 228 | 45.8126      | 8.6336        | Ispira ABC-IS   | Italy       |
| 5   | 0.40        |                   |                  | 0.78           | 4.48 | 0.48 | 36  | 44.3869      | 142.3186      | Moshiri Birch   | Japan       |
| 6   | 0.95        |                   |                  | 0.77           | 3.96 | 0.05 | 12  | 46.6531      | -91.0858      | Mixed young     | USA         |
| 7   | 0.60        |                   |                  | 0.73           | 6.06 | 0.47 | 132 | 47.4781      | 8.365         | Laegern         | Switzerland |
| 8   | 0.10        |                   |                  | 0.71           | 5.45 | 0.49 | 36  | 46.6347      | -91.0987      | Mature          | USA         |
| 9   | 1.00        |                   |                  | 0.71           | 2.27 | 0.06 | 60  | 49.0996      | 13.3047       | Lackenbergl     | Germany     |
| 10  | 0.90        |                   |                  | 0.70           | 7.81 | 0.48 | 192 | 39.3232      | -86.4131      | Morgan Monroe   | USA         |
| 11  | 0.95        |                   |                  | 0.70           | 3.03 | 0.05 | 60  | 44.3233      | -121.608      | Metolius Young  | USA         |
| 12  | 0.40        |                   |                  | 0.69           | 7.21 | 0.02 | 120 | 41.5545      | -83.8438      | Oak Openings    | USA         |
| 13  | 0.55        |                   |                  | 0.67           | 6.96 | 0.44 | 144 | 45.9562      | 11.2813       | Lavarone        | Italy       |
| 14  | 0.10        |                   |                  | 0.67           | 3.47 | 0.02 | 204 | 40.0329      | -105.546      | Niwot Ridge     | USA         |
| 15  | 1.00        |                   |                  | 0.67           | 5.91 | 0.02 | 180 | 45.5598      | -84.7138      | Univ. of Mich.  | USA         |
| 16  | 0.95        |                   |                  | 0.67           | 4.13 | 0.03 | 12  | 46.7223      | -91.2524      | Young hardwood  | USA         |
| 17  | 1.00        |                   |                  | 0.65           | 4.98 | 0.03 | 192 | 46.5869      | 11.4337       | Renon           | Italy       |
| 18  | 0.65        |                   |                  | 0.64           | 4.86 | 0.41 | 60  | 35.2617      | 137.0788      | Seto Mixed      | Japan       |
| 19  | 0.05        |                   |                  | 0.64           | 6.08 | 0.05 | 36  | 42.6353      | -80.5577      | Ontario-urkey   | Canada      |
| 20  | 0.45        |                   |                  | 0.63           | 5.41 | 0.02 | 156 | 44.4523      | -121.557      | Metolius mature | USA         |
| 21  | 0.30        |                   |                  | 0.63           | 3.33 | 0.02 | 132 | 41.3665      | -106.24       | GLEES           | USA         |
| 22  | 1.00        |                   |                  | 0.60           | 6.21 | 0.02 | 264 | 42.5378      | -72.1715      | Harvard Forest  | USA         |
| 23  | 0.05        | 0.429※            | Boreal Forest    | 0.79           | 5.89 | 0.04 | 228 | 50.3051      | 5.9981        | Vielsalm        | Belgium     |
| 24  | 0.05        |                   |                  | 0.76           | 5.18 | 0.02 | 228 | 52.1666      | 5.7436        | Loobos          | Netherlands |
| 25  | 0.50        |                   |                  | 0.73           | 6.51 | 0.03 | 228 | 50.9624      | 13.5652       | Tharandt        | Germany     |
| 26  | 1.00        |                   |                  | 0.72           | 6.22 | 0.02 | 84  | 50.7867      | 13.7213       | Oberbärenburg   | Germany     |
| 27  | 0.15        |                   |                  | 0.71           | 7.60 | 0.04 | 228 | 55.4859      | 11.6446       | Soroe           | Denmark     |
| 28  | 0.25        |                   |                  | 0.68           | 4.79 | 0.47 | 228 | 51.3092      | 4.5206        | Brasschaat      | Belgium     |

|    |      |        |           |      |      |      |     |          |          |                   |             |
|----|------|--------|-----------|------|------|------|-----|----------|----------|-------------------|-------------|
| 29 | 1.00 |        |           | 0.64 | 5.68 | 0.02 | 48  | 60.6418  | 23.9597  | Vielsalm          | Belgium     |
| 30 | 0.15 |        |           | 0.71 | 5.73 | 0.02 | 132 | 46.0147  | 11.0458  | Monte Bondone     | Italy       |
| 31 | 1.00 |        |           | 0.71 | 3.69 | 0.06 | 24  | 34.9604  | -97.9789 | Little Washita    | USA         |
| 32 | 0.05 |        |           | 0.71 | 5.80 | 0.03 | 132 | 50.95    | 13.5126  | Grillenburg       | Germany     |
| 33 | 0.10 |        |           | 0.69 | 4.57 | 0.04 | 108 | 49.4944  | 18.5429  | Bily Kriz         | Czech       |
| 34 | 0.10 |        |           | 0.61 | 7.57 | 0.46 | 120 | 47.1158  | 8.5378   | Früebüel          | Switzerland |
| 35 | 0.30 |        |           | 0.60 | 5.81 | 0.46 | 48  | 50.6219  | 6.3041   | Rollesbroich      | Germany     |
| 36 | 0.35 |        |           | 0.59 | 5.38 | 0.46 | 96  | 52.2404  | 5.0713   | Horstermeer       | Netherlands |
| 37 | 0.20 | 0.373※ | Grassland | 0.59 | 6.48 | 0.03 | 84  | 47.2858  | 7.7319   | Oensingen         | Switzerland |
| 38 | 0.10 |        |           | 0.58 | 5.14 | 0.03 | 96  | 41.8406  | -88.241  | Fermi National    | USA         |
| 39 | 1.00 |        |           | 0.57 | 3.00 | 0.44 | 168 | 38.4316  | -120.966 | Tonzi Ranch       | USA         |
| 40 | 0.10 |        |           | 0.53 | 2.36 | 0.46 | 48  | 44.5934  | 123.5092 | Changling         | China       |
| 41 | 0.50 |        |           | 0.52 | 8.45 | 0.02 | 132 | 47.1167  | 11.3175  | Neustift          | Austria     |
| 42 | 0.70 |        |           | 0.50 | 2.92 | 0.47 | 36  | 37.37    | 101.18   | Haibei Alpine     | China       |
| 43 | 0.85 |        |           | 0.47 | 8.00 | 0.02 | 120 | 47.2102  | 8.4104   | Chamau            | Switzerland |
| 44 | 0.10 |        |           | 0.45 | 4.51 | 0.06 | 84  | -14.1593 | 131.3881 | Daly River        | Australia   |
| 45 | 0.05 |        |           | 0.61 | 2.29 | 0.11 | 12  | 67.0547  | 62.9405  | Seida/Vorkuta     | Russia      |
| 46 | 1.00 |        |           | 0.59 | 2.85 | 0.06 | 12  | 46.6491  | -91.0693 | Red pine clearcut | USA         |
| 47 | 0.05 | 0.61※  | Shrubland | 0.58 | 2.03 | 0.48 | 72  | 54.0916  | -106.005 | Saskatchewan -    | Canada      |
| 48 | 0.95 |        |           | 0.45 | 2.24 | 0.07 | 24  | 46.6249  | -91.2982 | Pine barrens #1   | USA         |
| 49 | 1.00 |        |           | 0.45 | 3.35 | 0.03 | 132 | 40.6061  | 8.1515   | Arca di Noé - Le  | Italy       |

**Table S4.** Data used to validate model simulation of gross primary productivity (GPP)

| No. | Short Name | Country     | Latitude (°) | Longitude (°) | Biome                        |
|-----|------------|-------------|--------------|---------------|------------------------------|
| 1   | CN-Din     | China       | 23.1733      | 112.5361      | Evergreen Broadleaf Forests  |
| 2   | PA-SPn     | Panama      | 9.3181       | -79.6346      | Deciduous Broadleaf Forests  |
| 3   | GH-Ank     | Ghana       | 5.2685       | -2.6942       | Evergreen Broadleaf Forests  |
| 4   | BR-Sa1     | Brazil      | -2.8567      | -54.9589      | Evergreen Broadleaf Forests  |
| 5   | AU-Rob     | Australia   | -17.1175     | 145.6301      | Evergreen Broadleaf Forests  |
| 6   | ZM-Mon     | Zambia      | -15.4378     | 23.2528       | Deciduous Broadleaf Forests  |
| 7   | MY-PSO     | Malaysia    | 2.973        | 102.3062      | Evergreen Broadleaf Forests  |
| 8   | BR-Sa3     | Brazil      | -3.018       | -54.9714      | Evergreen Broadleaf Forests  |
| 9   | GF-Guy     | France      | 5.2788       | -52.9249      | Evergreen Broadleaf Forests  |
| 10  | AU-ASM     | Australia   | -22.283      | 133.249       | Evergreen Needleleaf Forests |
| 11  | IT-Isp     | Italy       | 45.8126      | 8.6336        | Deciduous Broadleaf Forests  |
| 12  | JP-MBF     | Japan       | 44.3869      | 142.3186      | Deciduous Broadleaf Forests  |
| 13  | US-Wi5     | USA         | 46.6531      | -91.0858      | Evergreen Needleleaf Forests |
| 14  | CH-Lae     | Switzerland | 47.4781      | 8.365         | Mixed Forests                |
| 15  | US-Wi3     | USA         | 46.6347      | -91.0987      | Deciduous Broadleaf Forests  |
| 16  | DE-Lkb     | Germany     | 49.0996      | 13.3047       | Evergreen Needleleaf Forests |
| 17  | US-MMS     | USA         | 39.3232      | -86.4131      | Deciduous Broadleaf Forests  |
| 18  | US-Me6     | USA         | 44.3233      | -121.608      | Evergreen Needleleaf Forests |
| 19  | US-Oho     | USA         | 41.5545      | -83.8438      | Deciduous Broadleaf Forests  |
| 20  | IT-Lav     | Italy       | 45.9562      | 11.2813       | Evergreen Needleleaf Forests |
| 21  | US-NR1     | USA         | 40.0329      | -105.546      | Evergreen Needleleaf Forests |
| 22  | US-UMB     | USA         | 45.5598      | -84.7138      | Deciduous Broadleaf Forests  |
| 23  | US-Wi8     | USA         | 46.7223      | -91.2524      | Deciduous Broadleaf Forests  |
| 24  | IT-Ren     | Italy       | 46.5869      | 11.4337       | Evergreen Needleleaf Forests |
| 25  | JP-SMF     | Japan       | 35.2617      | 137.0788      | Mixed Forests                |
| 26  | CA-TPD     | Canada      | 42.6353      | -80.5577      | Deciduous Broadleaf Forests  |
| 27  | US-Me2     | USA         | 44.4523      | -121.557      | Evergreen Needleleaf Forests |
| 28  | US-GLE     | USA         | 41.3665      | -106.24       | Evergreen Needleleaf Forests |
| 29  | US-Ha1     | USA         | 42.5378      | -72.1715      | Deciduous Broadleaf Forests  |

|    |        |             |          |          |                              |
|----|--------|-------------|----------|----------|------------------------------|
| 30 | CA-TP4 | Canada      | 42.7102  | -80.3574 | Evergreen Needleleaf Forests |
| 31 | CN-Cha | China       | 42.4025  | 128.0958 | Mixed Forests                |
| 32 | CA-TP3 | Canada      | 42.7068  | -80.3483 | Evergreen Needleleaf Forests |
| 33 | CZ-BK1 | Czech       | 49.5021  | 18.5369  | Evergreen Needleleaf Forests |
| 34 | US-Me3 | USA         | 44.3154  | -121.608 | Evergreen Needleleaf Forests |
| 35 | US-Me5 | USA         | 44.4372  | -121.567 | Evergreen Needleleaf Forests |
| 36 | IT-SR2 | Italy       | 43.732   | 10.291   | Evergreen Needleleaf Forests |
| 37 | US-Syv | USA         | 46.242   | -89.3477 | Mixed Forests                |
| 38 | US-Wi1 | USA         | 46.7305  | -91.2329 | Deciduous Broadleaf Forests  |
| 39 | US-WCr | USA         | 45.8059  | -90.0799 | Deciduous Broadleaf Forests  |
| 40 | US-UMd | USA         | 45.5625  | -84.6975 | Deciduous Broadleaf Forests  |
| 41 | IT-PT1 | Italy       | 45.2009  | 9.061    | Deciduous Broadleaf Forests  |
| 42 | US-Wi9 | USA         | 46.6188  | -91.0814 | Evergreen Needleleaf Forests |
| 43 | US-Wi4 | USA         | 46.7393  | -91.1663 | Evergreen Needleleaf Forests |
| 44 | CH-Dav | Switzerland | 46.8153  | 9.8559   | Evergreen Needleleaf Forests |
| 45 | CA-Qfo | Canada      | 49.6925  | -74.3421 | Evergreen Needleleaf Forests |
| 46 | CA-Gro | Canada      | 48.2167  | -82.1556 | Mixed Forests                |
| 47 | FR-LBr | France      | 44.7171  | -0.7693  | Evergreen Needleleaf Forests |
| 48 | AU-Wom | Australia   | -37.4222 | 144.0944 | Evergreen Broadleaf Forests  |
| 49 | US-Me1 | USA         | 44.5794  | -121.5   | Evergreen Needleleaf Forests |
| 50 | IT-SRo | Italy       | 43.7279  | 10.2844  | Evergreen Needleleaf Forests |
| 51 | US-KS1 | USA         | 28.4583  | -80.6709 | Evergreen Needleleaf Forests |
| 52 | IT-La2 | Italy       | 45.9542  | 11.2853  | Evergreen Needleleaf Forests |
| 53 | CA-TP1 | Canada      | 42.6609  | -80.5595 | Evergreen Needleleaf Forests |
| 54 | FR-Fon | France      | 48.4764  | 2.7801   | Deciduous Broadleaf Forests  |
| 55 | AU-Tum | Australia   | -35.6566 | 148.1517 | Evergreen Broadleaf Forests  |
| 56 | AU-Cum | Australia   | -33.6133 | 150.7225 | Evergreen Broadleaf Forests  |
| 57 | FR-Pue | France      | 43.7414  | 3.5958   | Evergreen Broadleaf Forests  |
| 58 | IT-Cp2 | Italy       | 41.7043  | 12.3573  | Evergreen Broadleaf Forests  |
| 59 | IT-Ro2 | Italy       | 42.3903  | 11.9209  | Deciduous Broadleaf Forests  |

|    |        |             |          |          |                              |
|----|--------|-------------|----------|----------|------------------------------|
| 60 | US-Wi0 | USA         | 46.6188  | -91.0814 | Evergreen Needleleaf Forests |
| 61 | US-GBT | USA         | 41.3658  | -106.24  | Evergreen Needleleaf Forests |
| 62 | CN-Qia | China       | 26.7414  | 115.0581 | Evergreen Needleleaf Forests |
| 63 | IT-Ro1 | Italy       | 42.4081  | 11.93    | Deciduous Broadleaf Forests  |
| 64 | US-Blo | USA         | 38.8953  | -120.633 | Evergreen Needleleaf Forests |
| 65 | IT-CA1 | Italy       | 42.3804  | 12.0266  | Deciduous Broadleaf Forests  |
| 66 | IT-Col | Italy       | 41.8494  | 13.5881  | Deciduous Broadleaf Forests  |
| 67 | IT-CA3 | Italy       | 42.38    | 12.0222  | Deciduous Broadleaf Forests  |
| 68 | US-Me4 | USA         | 44.4992  | -121.622 | Evergreen Needleleaf Forests |
| 69 | AU-Whr | Australia   | -36.6732 | 145.0294 | Evergreen Broadleaf Forests  |
| 70 | US-ARM | USA         | 36.6058  | -97.4888 | Mixed Forests                |
| 71 | AU-Wac | Australia   | -37.4259 | 145.1878 | Evergreen Broadleaf Forests  |
| 72 | AU-Lox | Australia   | -34.4704 | 140.6551 | Deciduous Broadleaf Forests  |
| 73 | US-Wi2 | USA         | 46.6869  | -91.1528 | Evergreen Needleleaf Forests |
| 74 | BE-Vie | Belgium     | 50.3051  | 5.9981   | Mixed Forests                |
| 75 | NL-Loo | Netherlands | 52.1666  | 5.7436   | Evergreen Needleleaf Forests |
| 76 | DE-Tha | Germany     | 50.9624  | 13.5652  | Evergreen Needleleaf Forests |
| 77 | DE-Obe | Germany     | 50.7867  | 13.7213  | Evergreen Needleleaf Forests |
| 78 | DK-Sor | Denmark     | 55.4859  | 11.6446  | Deciduous Broadleaf Forests  |
| 79 | BE-Bra | Belgium     | 51.3092  | 4.5206   | Mixed Forests                |
| 80 | FI-Let | Finland     | 60.6418  | 23.9597  | Evergreen Needleleaf Forests |
| 81 | CA-SF2 | Canada      | 54.2539  | -105.878 | Evergreen Needleleaf Forests |
| 82 | CA-Obs | Canada      | 53.9872  | -105.118 | Evergreen Needleleaf Forests |
| 83 | DE-Lnf | Germany     | 51.3282  | 10.3678  | Deciduous Broadleaf Forests  |
| 84 | DE-Hai | Germany     | 51.0792  | 10.453   | Deciduous Broadleaf Forests  |
| 85 | RU-Fyo | Russia      | 56.4615  | 32.9221  | Evergreen Needleleaf Forests |
| 86 | FI-Hyy | Finland     | 61.8474  | 24.2948  | Evergreen Needleleaf Forests |
| 87 | CA-Oas | Canada      | 53.6289  | -106.198 | Evergreen Needleleaf Forests |
| 88 | CA-SF1 | Canada      | 54.485   | -105.818 | Evergreen Needleleaf Forests |
| 89 | FI-Sod | Finland     | 67.3619  | 26.6378  | Evergreen Needleleaf Forests |

|     |        |             |          |          |                              |
|-----|--------|-------------|----------|----------|------------------------------|
| 90  | CA-NS1 | Canada      | 55.8792  | -98.4839 | Evergreen Needleleaf Forests |
| 91  | CA-NS4 | Canada      | 55.9144  | -98.3806 | Evergreen Needleleaf Forests |
| 92  | CA-NS3 | Canada      | 55.9117  | -98.3822 | Evergreen Needleleaf Forests |
| 93  | CA-NS5 | Canada      | 55.8631  | -98.485  | Evergreen Needleleaf Forests |
| 94  | RU-SkP | Russia      | 62.255   | 129.168  | Deciduous Needleleaf Forests |
| 95  | CA-NS2 | Canada      | 55.9058  | -98.5247 | Evergreen Needleleaf Forests |
| 96  | US-Prr | USA         | 65.1237  | -147.488 | Evergreen Needleleaf Forests |
| 97  | CA-Man | Canada      | 55.8796  | -98.4808 | Evergreen Needleleaf Forests |
| 98  | IT-MBo | Italy       | 46.0147  | 11.0458  | Grasslands                   |
| 99  | US-LWW | USA         | 34.9604  | -97.9789 | Grasslands                   |
| 100 | DE-Gri | Germany     | 50.95    | 13.5126  | Grasslands                   |
| 101 | CZ-BK2 | Czech       | 49.4944  | 18.5429  | Grasslands                   |
| 102 | CH-Fru | Switzerland | 47.1158  | 8.5378   | Grasslands                   |
| 103 | DE-RuR | Germany     | 50.6219  | 6.3041   | Grasslands                   |
| 104 | NL-Hor | Netherlands | 52.2404  | 5.0713   | Grasslands                   |
| 105 | CH-Oe1 | Switzerland | 47.2858  | 7.7319   | Grasslands                   |
| 106 | US-IB2 | USA         | 41.8406  | -88.241  | Grasslands                   |
| 107 | US-Ton | USA         | 38.4316  | -120.966 | Savannas                     |
| 108 | CN-Cng | China       | 44.5934  | 123.5092 | Grasslands                   |
| 109 | AT-Neu | Austria     | 47.1167  | 11.3175  | Grasslands                   |
| 110 | CN-HaM | China       | 37.37    | 101.18   | Grasslands                   |
| 111 | CH-Cha | Switzerland | 47.2102  | 8.4104   | Grasslands                   |
| 112 | AU-DaS | Australia   | -14.1593 | 131.3881 | Savannas                     |
| 113 | DK-Eng | Denmark     | 55.6905  | 12.1918  | Grasslands                   |
| 114 | IT-Tor | Italy       | 45.8444  | 7.5781   | Grasslands                   |
| 115 | US-Cop | USA         | 38.09    | -109.39  | Grasslands                   |
| 116 | US-ARc | USA         | 35.5465  | -98.04   | Grasslands                   |

---

**Table S5.** Data on total biomass taken from global 933 sites and used to validate model performance.

| NO. | Latitude(°) | Longitude(°) | MAT(°C) | MAP(mm) | Total Biomass<br>(Mg ha <sup>-1</sup> ) | Forest type     | Ref.  |
|-----|-------------|--------------|---------|---------|-----------------------------------------|-----------------|-------|
| 1   | -19.38      | 146.48       | 22.10   | 1075.00 | 61.65                                   | tropical forest | [116] |
| 2   | -19.18      | 146.06       | 22.10   | 1075.00 | 41.00                                   | tropical forest | [116] |
| 3   | -17.12      | 145.63       | 21.40   | 2045.00 | 333.60                                  | tropical forest | [116] |
| 4   | -1.49       | 120.05       | 22.50   | 1790.00 | 302.70                                  | tropical forest | [117] |
| 5   | 0.91        | 110.71       | 25.80   | 3415.00 | 272.30                                  | tropical forest | [118] |
| 6   | 1.05        | 110.91       | 25.70   | 3738.00 | 233.90                                  | tropical forest | [118] |
| 7   | -14.53      | -61.48       | 25.70   | 1317.00 | 266.25                                  | tropical forest | [119] |
| 8   | -14.35      | -61.16       | 25.90   | 1384.00 | 199.00                                  | tropical forest | [119] |
| 9   | -12.89      | 24.48        | 21.40   | 1072.00 | 213.60                                  | tropical forest | [119] |
| 10  | -12.83      | -69.27       | 25.20   | 2426.00 | 320.15                                  | tropical forest | [119] |
| 11  | -12.50      | -68.95       | 25.50   | 2110.00 | 316.50                                  | tropical forest | [119] |
| 12  | -12.49      | -69.11       | 25.20   | 2110.00 | 320.95                                  | tropical forest | [119] |
| 13  | -10.12      | -68.00       | 26.30   | 1927.00 | 226.10                                  | tropical forest | [119] |
| 14  | -8.75       | -63.38       | 26.30   | 2184.00 | 340.30                                  | tropical forest | [119] |
| 15  | -3.95       | -73.43       | 26.40   | 2871.00 | 316.70                                  | tropical forest | [119] |
| 16  | -3.43       | -72.85       | 26.30   | 2783.00 | 356.00                                  | tropical forest | [119] |
| 17  | -3.23       | -72.90       | 26.30   | 2783.00 | 336.75                                  | tropical forest | [119] |
| 18  | -2.98       | -47.52       | 26.90   | 2403.00 | 148.80                                  | tropical forest | [119] |
| 19  | -1.07       | -77.60       | 23.30   | 4177.00 | 332.05                                  | tropical forest | [119] |
| 20  | -0.63       | -76.14       | 26.00   | 3339.00 | 305.68                                  | tropical forest | [119] |
| 21  | -0.22       | -78.05       | 11.50   | 1092.00 | 387.90                                  | tropical forest | [119] |
| 22  | 1.33        | 28.60        | 23.50   | 1386.00 | 240.17                                  | tropical forest | [119] |
| 23  | 1.93        | -67.05       | 26.00   | 3185.00 | 337.00                                  | tropical forest | [119] |
| 24  | 4.75        | -53.00       | 25.70   | 3016.00 | 368.90                                  | tropical forest | [119] |
| 25  | 5.00        | 117.50       | 25.20   | 2662.00 | 392.70                                  | tropical forest | [119] |
| 26  | 9.50        | -70.00       | 23.10   | 1216.00 | 352.20                                  | tropical forest | [119] |
| 27  | 9.85        | -83.60       | 18.00   | 4429.00 | 207.10                                  | tropical forest | [119] |
| 28  | 10.00       | -66.00       | 24.80   | 1590.00 | 166.60                                  | tropical forest | [119] |



|    |       |         |       |         |        |                 |       |
|----|-------|---------|-------|---------|--------|-----------------|-------|
| 29 | 19.50 | -105.02 | 26.30 | 976.00  | 107.57 | tropical forest | [119] |
| 30 | 25.25 | 107.98  | 17.90 | 1229.00 | 106.10 | tropical forest | [119] |
| 31 | 25.90 | 110.10  | 16.70 | 1568.00 | 254.20 | tropical forest | [119] |
| 32 | 26.00 | 119.30  | 18.20 | 1552.00 | 210.70 | tropical forest | [119] |
| 33 | 26.08 | 99.56   | 10.40 | 1001.00 | 158.40 | tropical forest | [119] |
| 34 | 26.20 | 110.20  | 13.30 | 1453.00 | 418.50 | tropical forest | [119] |
| 35 | 26.37 | 100.10  | 15.60 | 1049.00 | 235.60 | tropical forest | [119] |
| 36 | 27.00 | 118.90  | 17.00 | 1685.00 | 240.30 | tropical forest | [119] |
| 37 | 28.50 | 106.32  | 16.40 | 1101.00 | 155.80 | tropical forest | [119] |
| 38 | 29.80 | 78.65   | 20.40 | 1124.00 | 23.90  | tropical forest | [119] |
| 39 | 18.71 | 108.83  | 24.50 | 2068.00 | 113.60 | tropical forest | [102] |
| 40 | 19.73 | 109.47  | 24.80 | 1804.00 | 98.65  | tropical forest | [102] |
| 41 | 21.58 | 110.06  | 22.90 | 1683.00 | 134.67 | tropical forest | [102] |
| 42 | 21.85 | 109.78  | 22.60 | 1684.00 | 74.20  | tropical forest | [102] |
| 43 | 21.88 | 101.29  | 21.50 | 1341.00 | 36.50  | tropical forest | [102] |
| 44 | 22.13 | 106.82  | 22.40 | 1368.00 | 93.83  | tropical forest | [102] |
| 45 | 22.43 | 100.98  | 20.80 | 1342.00 | 79.30  | tropical forest | [102] |
| 46 | 22.58 | 109.88  | 21.40 | 1634.00 | 162.90 | tropical forest | [102] |
| 47 | 22.68 | 112.90  | 21.90 | 1833.00 | 102.59 | tropical forest | [102] |
| 48 | 23.03 | 108.51  | 21.30 | 1414.00 | 124.53 | tropical forest | [102] |
| 49 | 23.13 | 111.83  | 21.20 | 1654.00 | 80.02  | tropical forest | [102] |
| 50 | 23.20 | 100.85  | 18.70 | 1328.00 | 105.75 | tropical forest | [102] |
| 51 | 23.75 | 109.81  | 20.80 | 1592.00 | 158.95 | tropical forest | [102] |
| 52 | 24.33 | 99.45   | 18.40 | 1268.00 | 145.05 | tropical forest | [102] |
| 53 | 24.88 | 108.93  | 19.70 | 1355.00 | 78.70  | tropical forest | [102] |
| 54 | 24.99 | 107.49  | 20.00 | 1204.00 | 72.83  | tropical forest | [102] |
| 55 | 25.15 | 102.78  | 14.50 | 1032.00 | 130.40 | tropical forest | [102] |
| 56 | 25.30 | 118.35  | 19.80 | 1474.00 | 74.47  | tropical forest | [102] |
| 57 | 25.67 | 116.43  | 18.80 | 1608.00 | 72.98  | tropical forest | [102] |
| 58 | 26.02 | 117.35  | 18.20 | 1666.00 | 124.80 | tropical forest | [102] |
| 59 | 26.16 | 117.54  | 18.10 | 1648.00 | 185.67 | tropical forest | [102] |

|    |        |        |       |         |        |                 |       |
|----|--------|--------|-------|---------|--------|-----------------|-------|
| 60 | 26.19  | 106.43 | 15.90 | 1155.00 | 86.90  | tropical forest | [102] |
| 61 | 26.19  | 107.30 | 15.10 | 1172.00 | 119.25 | tropical forest | [102] |
| 62 | 26.26  | 117.46 | 18.20 | 1666.00 | 128.10 | tropical forest | [102] |
| 63 | 26.30  | 119.11 | 18.20 | 1552.00 | 244.90 | tropical forest | [102] |
| 64 | 26.33  | 117.31 | 18.20 | 1666.00 | 194.80 | tropical forest | [102] |
| 65 | 26.38  | 117.79 | 18.10 | 1648.00 | 132.64 | tropical forest | [102] |
| 66 | 26.43  | 118.48 | 17.70 | 1620.00 | 182.90 | tropical forest | [102] |
| 67 | 26.47  | 117.95 | 18.10 | 1648.00 | 265.30 | tropical forest | [102] |
| 68 | 26.56  | 117.78 | 17.60 | 1705.00 | 123.93 | tropical forest | [102] |
| 69 | 26.62  | 106.43 | 13.70 | 1112.00 | 142.04 | tropical forest | [102] |
| 70 | 26.63  | 117.95 | 17.60 | 1705.00 | 254.83 | tropical forest | [102] |
| 71 | 26.77  | 118.01 | 17.70 | 1679.00 | 226.53 | tropical forest | [102] |
| 72 | 26.78  | 109.63 | 16.40 | 1354.00 | 216.62 | tropical forest | [102] |
| 73 | 27.10  | 117.30 | 17.00 | 1748.00 | 248.60 | tropical forest | [102] |
| 74 | 27.74  | 113.54 | 17.30 | 1494.00 | 63.10  | tropical forest | [102] |
| 75 | 28.39  | 114.12 | 15.70 | 1508.00 | 119.67 | tropical forest | [102] |
| 76 | 28.53  | 106.10 | 16.40 | 1101.00 | 149.40 | tropical forest | [102] |
| 77 | 28.69  | 110.54 | 15.90 | 1323.00 | 185.80 | tropical forest | [102] |
| 78 | 28.76  | 110.03 | 16.00 | 1321.00 | 138.57 | tropical forest | [102] |
| 79 | 19.50  | 99.00  | 23.70 | 1360.00 | 175.30 | tropical forest | [120] |
| 80 | 24.92  | 83.12  | 25.20 | 1003.00 | 89.90  | tropical forest | [120] |
| 81 | 25.05  | 83.22  | 26.10 | 987.00  | 31.80  | tropical forest | [120] |
| 82 | 29.00  | 77.14  | 24.50 | 774.00  | 117.54 | tropical forest | [120] |
| 83 | -12.90 | 24.50  | 21.40 | 1072.00 | 195.10 | tropical forest | [121] |
| 84 | -12.74 | 24.58  | 21.40 | 1072.00 | 169.80 | tropical forest | [121] |
| 85 | -8.59  | 35.56  | 23.70 | 1176.00 | 180.20 | tropical forest | [121] |
| 86 | -7.74  | 36.91  | 20.90 | 1314.00 | 379.28 | tropical forest | [121] |
| 87 | -7.18  | 36.96  | 21.10 | 1078.00 | 290.20 | tropical forest | [121] |
| 88 | -7.01  | 37.81  | 23.00 | 1296.00 | 281.50 | tropical forest | [121] |
| 89 | -0.64  | 11.03  | 25.80 | 1897.00 | 278.00 | tropical forest | [121] |
| 90 | -0.19  | 12.20  | 26.20 | 1703.00 | 314.80 | tropical forest | [121] |

|     |        |        |       |         |        |                                    |       |
|-----|--------|--------|-------|---------|--------|------------------------------------|-------|
| 91  | -0.15  | 12.27  | 26.20 | 1703.00 | 374.00 | tropical forest                    | [121] |
| 92  | -0.15  | 13.05  | 24.80 | 1682.00 | 269.70 | tropical forest                    | [121] |
| 93  | 1.36   | 17.84  | 25.10 | 1685.00 | 221.00 | tropical forest                    | [121] |
| 94  | 2.38   | 16.91  | 24.80 | 1636.00 | 428.40 | tropical forest                    | [121] |
| 95  | 2.43   | 13.52  | 24.00 | 1604.00 | 304.30 | tropical forest                    | [121] |
| 96  | 2.46   | 16.56  | 25.80 | 1623.00 | 522.90 | tropical forest                    | [121] |
| 97  | 2.63   | 14.14  | 24.00 | 1587.00 | 214.60 | tropical forest                    | [121] |
| 98  | 3.16   | 101.66 | 25.40 | 2464.00 | 183.34 | tropical forest                    | [121] |
| 99  | 3.28   | 12.89  | 23.90 | 1598.00 | 344.30 | tropical forest                    | [121] |
| 100 | 5.18   | 9.68   | 23.60 | 2442.00 | 303.90 | tropical forest                    | [121] |
| 101 | 6.05   | 9.28   | 25.30 | 2204.00 | 371.40 | tropical forest                    | [121] |
| 102 | 6.31   | 9.37   | 25.30 | 2204.00 | 339.30 | tropical forest                    | [121] |
| 103 | 6.58   | 4.28   | 27.30 | 1576.00 | 108.85 | tropical forest                    | [121] |
| 104 | 7.08   | 80.50  | 23.10 | 1759.00 | 296.80 | tropical forest                    | [121] |
| 105 | -37.32 | 141.78 | 15.30 | 411.00  | 29.70  | temperate evergreen conifer forest | [116] |
| 106 | 55.45  | 56.35  | 3.00  | 546.00  | 41.20  | temperate evergreen conifer forest | [120] |
| 107 | 35.54  | 109.00 | 11.30 | 521.00  | 57.58  | temperate evergreen conifer forest | [102] |
| 108 | 50.67  | 26.50  | 8.00  | 563.00  | 59.78  | temperate evergreen conifer forest | [120] |
| 109 | 35.69  | 109.10 | 11.30 | 521.00  | 60.39  | temperate evergreen conifer forest | [102] |
| 110 | 53.75  | 51.56  | 5.50  | 337.00  | 65.30  | temperate evergreen conifer forest | [120] |
| 111 | 35.80  | 109.70 | 11.40 | 526.00  | 65.60  | temperate evergreen conifer forest | [102] |
| 112 | 53.57  | 51.16  | 4.40  | 475.00  | 69.06  | temperate evergreen conifer forest | [120] |
| 113 | 34.96  | 107.84 | 9.80  | 618.00  | 72.36  | temperate evergreen conifer forest | [102] |
| 114 | 35.08  | 108.55 | 10.50 | 560.00  | 73.88  | temperate evergreen conifer forest | [102] |
| 115 | 51.11  | 40.76  | 5.90  | 434.00  | 74.41  | temperate evergreen conifer forest | [120] |
| 116 | 54.27  | 85.13  | -2.80 | 524.00  | 74.85  | temperate evergreen conifer forest | [120] |
| 117 | 27.27  | 115.12 | 18.70 | 1568.00 | 74.90  | temperate evergreen conifer forest | [102] |
| 118 | 33.52  | 108.42 | 9.60  | 730.00  | 75.25  | temperate evergreen conifer forest | [102] |
| 119 | 29.72  | 118.79 | 14.80 | 1554.00 | 76.60  | temperate evergreen conifer forest | [102] |
| 120 | 42.00  | 27.00  | 12.40 | 592.00  | 77.18  | temperate evergreen conifer forest | [120] |
| 121 | 51.20  | 40.19  | 7.80  | 493.00  | 79.09  | temperate evergreen conifer forest | [120] |

|     |        |        |       |         |        |                                    |       |
|-----|--------|--------|-------|---------|--------|------------------------------------|-------|
| 122 | -25.52 | 152.25 | 20.40 | 946.00  | 79.30  | temperate evergreen conifer forest | [116] |
| 123 | 51.67  | 39.17  | 6.30  | 542.00  | 82.17  | temperate evergreen conifer forest | [120] |
| 124 | 36.80  | 112.01 | 7.70  | 512.00  | 84.87  | temperate evergreen conifer forest | [102] |
| 125 | 58.50  | 26.83  | 4.90  | 629.00  | 86.20  | temperate evergreen conifer forest | [120] |
| 126 | 52.29  | 44.13  | 7.00  | 461.00  | 86.39  | temperate evergreen conifer forest | [120] |
| 127 | -35.47 | 150.20 | 14.80 | 952.00  | 88.90  | temperate evergreen conifer forest | [116] |
| 128 | 43.83  | 117.15 | 0.40  | 352.00  | 97.70  | temperate evergreen conifer forest | [102] |
| 129 | 28.26  | 113.08 | 17.50 | 1433.00 | 98.10  | temperate evergreen conifer forest | [102] |
| 130 | 36.50  | 137.00 | 12.90 | 2236.00 | 100.13 | temperate evergreen conifer forest | [120] |
| 131 | 51.05  | 83.51  | 2.20  | 498.00  | 102.46 | temperate evergreen conifer forest | [120] |
| 132 | 34.16  | 133.76 | 14.80 | 1255.00 | 102.73 | temperate evergreen conifer forest | [121] |
| 133 | 43.21  | 77.00  | 4.90  | 384.00  | 105.40 | temperate evergreen conifer forest | [120] |
| 134 | 29.91  | 103.22 | 14.70 | 1156.00 | 107.78 | temperate evergreen conifer forest | [102] |
| 135 | 31.27  | 105.47 | 16.60 | 945.00  | 107.90 | temperate evergreen conifer forest | [102] |
| 136 | 56.36  | 80.00  | 3.30  | 328.00  | 108.57 | temperate evergreen conifer forest | [120] |
| 137 | -37.54 | 141.48 | 15.80 | 416.00  | 111.20 | temperate evergreen conifer forest | [116] |
| 138 | 48.67  | 7.08   | 9.60  | 723.00  | 111.40 | temperate evergreen conifer forest | [120] |
| 139 | 54.75  | 28.17  | 6.00  | 658.00  | 111.52 | temperate evergreen conifer forest | [120] |
| 140 | 34.50  | 136.33 | 13.30 | 1626.00 | 113.50 | temperate evergreen conifer forest | [121] |
| 141 | 51.57  | 32.57  | 6.90  | 610.00  | 113.55 | temperate evergreen conifer forest | [120] |
| 142 | 33.38  | 104.68 | 10.90 | 656.00  | 113.60 | temperate evergreen conifer forest | [102] |
| 143 | 54.50  | 27.00  | 6.10  | 641.00  | 113.76 | temperate evergreen conifer forest | [120] |
| 144 | 56.16  | 80.30  | 2.20  | 350.00  | 113.83 | temperate evergreen conifer forest | [120] |
| 145 | 32.50  | 130.70 | 14.80 | 2353.00 | 114.30 | temperate evergreen conifer forest | [121] |
| 146 | 32.98  | 104.19 | 10.70 | 708.00  | 114.30 | temperate evergreen conifer forest | [119] |
| 147 | 33.94  | 105.33 | 10.60 | 616.00  | 115.02 | temperate evergreen conifer forest | [102] |
| 148 | 31.10  | 116.18 | 14.70 | 1231.00 | 115.97 | temperate evergreen conifer forest | [102] |
| 149 | 39.03  | 141.35 | 9.30  | 1433.00 | 116.20 | temperate evergreen conifer forest | [121] |
| 150 | 39.02  | 113.48 | 5.00  | 469.00  | 116.50 | temperate evergreen conifer forest | [102] |
| 151 | 30.55  | 120.22 | 16.20 | 1308.00 | 118.07 | temperate evergreen conifer forest | [102] |
| 152 | 51.04  | 27.09  | 7.80  | 588.00  | 119.10 | temperate evergreen conifer forest | [120] |

|     |        |        |       |         |        |                                    |       |
|-----|--------|--------|-------|---------|--------|------------------------------------|-------|
| 153 | 41.26  | 118.45 | 4.30  | 469.00  | 120.77 | temperate evergreen conifer forest | [102] |
| 154 | 29.50  | 104.33 | 17.40 | 1107.00 | 121.23 | temperate evergreen conifer forest | [102] |
| 155 | 51.05  | 26.96  | 7.80  | 593.00  | 121.41 | temperate evergreen conifer forest | [120] |
| 156 | 51.00  | 27.00  | 7.80  | 588.00  | 121.46 | temperate evergreen conifer forest | [120] |
| 157 | 50.59  | 83.70  | 2.70  | 285.00  | 121.52 | temperate evergreen conifer forest | [120] |
| 158 | 51.17  | -0.88  | 9.60  | 770.00  | 122.14 | temperate evergreen conifer forest | [120] |
| 159 | 40.55  | 117.52 | 6.70  | 481.00  | 122.70 | temperate evergreen conifer forest | [102] |
| 160 | 51.17  | 0.17   | 9.70  | 762.00  | 123.46 | temperate evergreen conifer forest | [120] |
| 161 | 31.75  | 105.21 | 16.40 | 889.00  | 124.00 | temperate evergreen conifer forest | [102] |
| 162 | -35.14 | 147.23 | 15.10 | 877.00  | 124.20 | temperate evergreen conifer forest | [116] |
| 163 | 32.18  | 118.59 | 15.30 | 1039.00 | 125.10 | temperate evergreen conifer forest | [102] |
| 164 | 31.10  | 97.10  | -2.50 | 463.00  | 126.10 | temperate evergreen conifer forest | [119] |
| 165 | 35.06  | -83.43 | 12.00 | 1697.00 | 126.80 | temperate evergreen conifer forest | [121] |
| 166 | -25.85 | 152.65 | 21.30 | 1161.00 | 127.36 | temperate evergreen conifer forest | [116] |
| 167 | 54.20  | -2.88  | 8.30  | 1728.00 | 129.00 | temperate evergreen conifer forest | [120] |
| 168 | 32.00  | 110.70 | 12.90 | 905.00  | 129.30 | temperate evergreen conifer forest | [119] |
| 169 | 51.00  | 27.67  | 7.70  | 593.00  | 132.30 | temperate evergreen conifer forest | [120] |
| 170 | 55.32  | -3.55  | 7.60  | 1455.00 | 132.90 | temperate evergreen conifer forest | [120] |
| 171 | 51.11  | 27.21  | 7.80  | 588.00  | 133.23 | temperate evergreen conifer forest | [120] |
| 172 | 56.00  | 38.00  | 4.40  | 665.00  | 133.34 | temperate evergreen conifer forest | [120] |
| 173 | -37.38 | 141.48 | 13.90 | 603.00  | 133.80 | temperate evergreen conifer forest | [116] |
| 174 | 36.00  | -79.00 | 14.50 | 1133.00 | 135.42 | temperate evergreen conifer forest | [121] |
| 175 | 44.08  | 6.98   | 7.70  | 1177.00 | 136.18 | temperate evergreen conifer forest | [120] |
| 176 | 30.95  | 112.05 | 16.90 | 1070.00 | 140.50 | temperate evergreen conifer forest | [102] |
| 177 | 33.48  | 111.94 | 14.00 | 761.00  | 140.50 | temperate evergreen conifer forest | [102] |
| 178 | 40.67  | -7.71  | 13.50 | 665.00  | 140.90 | temperate evergreen conifer forest | [120] |
| 179 | 56.30  | 76.00  | 2.80  | 272.00  | 141.95 | temperate evergreen conifer forest | [120] |
| 180 | 29.62  | 119.02 | 15.30 | 1524.00 | 143.23 | temperate evergreen conifer forest | [102] |
| 181 | 41.42  | 118.52 | 4.20  | 477.00  | 143.83 | temperate evergreen conifer forest | [102] |
| 182 | 50.63  | 83.30  | 3.00  | 327.00  | 145.08 | temperate evergreen conifer forest | [120] |
| 183 | -29.07 | 152.80 | 18.70 | 1134.00 | 147.14 | temperate evergreen conifer forest | [116] |

|     |        |        |       |         |        |                                    |       |
|-----|--------|--------|-------|---------|--------|------------------------------------|-------|
| 184 | 33.90  | 107.70 | 5.40  | 718.00  | 148.80 | temperate evergreen conifer forest | [119] |
| 185 | 56.33  | 42.50  | 4.40  | 596.00  | 149.82 | temperate evergreen conifer forest | [120] |
| 186 | 53.42  | 50.93  | 4.60  | 429.00  | 152.69 | temperate evergreen conifer forest | [120] |
| 187 | 28.74  | 103.05 | 10.70 | 978.00  | 152.77 | temperate evergreen conifer forest | [102] |
| 188 | 51.25  | 40.29  | 7.00  | 414.00  | 156.20 | temperate evergreen conifer forest | [120] |
| 189 | 31.20  | 98.80  | 2.00  | 538.00  | 156.70 | temperate evergreen conifer forest | [119] |
| 190 | -36.86 | 148.24 | 9.10  | 996.00  | 156.90 | temperate evergreen conifer forest | [116] |
| 191 | 37.83  | 111.44 | 6.90  | 459.00  | 157.66 | temperate evergreen conifer forest | [102] |
| 192 | 55.67  | 36.67  | 4.80  | 680.00  | 160.13 | temperate evergreen conifer forest | [120] |
| 193 | -25.45 | 152.42 | 21.30 | 1011.00 | 161.10 | temperate evergreen conifer forest | [116] |
| 194 | 30.96  | 103.13 | 12.40 | 925.00  | 163.00 | temperate evergreen conifer forest | [102] |
| 195 | -37.33 | 142.52 | 12.50 | 588.00  | 164.05 | temperate evergreen conifer forest | [116] |
| 196 | 31.02  | 103.57 | 13.70 | 900.00  | 166.80 | temperate evergreen conifer forest | [102] |
| 197 | -32.75 | 150.71 | 16.40 | 772.00  | 168.50 | temperate evergreen conifer forest | [116] |
| 198 | 48.78  | 24.00  | 6.00  | 847.00  | 168.55 | temperate evergreen conifer forest | [120] |
| 199 | 49.45  | 36.47  | 8.10  | 521.00  | 169.10 | temperate evergreen conifer forest | [120] |
| 200 | -42.86 | 146.81 | 9.10  | 1082.00 | 170.85 | temperate evergreen conifer forest | [116] |
| 201 | 55.33  | 37.00  | 5.10  | 640.00  | 172.73 | temperate evergreen conifer forest | [120] |
| 202 | 41.95  | 13.14  | 15.20 | 839.00  | 175.60 | temperate evergreen conifer forest | [120] |
| 203 | 55.50  | -2.67  | 7.70  | 862.00  | 176.20 | temperate evergreen conifer forest | [120] |
| 204 | 55.50  | -2.48  | 8.40  | 764.00  | 176.20 | temperate evergreen conifer forest | [121] |
| 205 | 55.42  | 26.02  | 5.90  | 661.00  | 177.00 | temperate evergreen conifer forest | [119] |
| 206 | -26.12 | 152.69 | 20.30 | 1153.00 | 178.70 | temperate evergreen conifer forest | [116] |
| 207 | 33.53  | 104.91 | 10.30 | 599.00  | 178.90 | temperate evergreen conifer forest | [119] |
| 208 | 42.00  | 27.50  | 13.10 | 578.00  | 179.38 | temperate evergreen conifer forest | [120] |
| 209 | 33.00  | 131.50 | 15.00 | 1824.00 | 179.50 | temperate evergreen conifer forest | [121] |
| 210 | 42.33  | -8.67  | 13.80 | 1545.00 | 179.50 | temperate evergreen conifer forest | [120] |
| 211 | 48.30  | 24.30  | 4.20  | 961.00  | 180.33 | temperate evergreen conifer forest | [120] |
| 212 | 29.00  | 93.10  | 3.20  | 723.00  | 180.95 | temperate evergreen conifer forest | [119] |
| 213 | 42.86  | -4.03  | 11.80 | 526.00  | 181.93 | temperate evergreen conifer forest | [120] |
| 214 | 51.30  | 4.52   | 10.10 | 790.00  | 185.68 | temperate evergreen conifer forest | [120] |

|     |        |         |       |         |        |                                    |       |
|-----|--------|---------|-------|---------|--------|------------------------------------|-------|
| 215 | 28.30  | 103.40  | 13.50 | 1016.00 | 185.70 | temperate evergreen conifer forest | [119] |
| 216 | -40.89 | 144.95  | 12.60 | 1046.00 | 187.65 | temperate evergreen conifer forest | [116] |
| 217 | 28.90  | 99.02   | 8.40  | 826.00  | 188.20 | temperate evergreen conifer forest | [119] |
| 218 | 30.90  | 102.40  | 6.20  | 742.00  | 188.48 | temperate evergreen conifer forest | [119] |
| 219 | 33.60  | 104.41  | 6.10  | 596.00  | 188.80 | temperate evergreen conifer forest | [119] |
| 220 | 27.97  | 98.96   | 7.20  | 924.00  | 189.30 | temperate evergreen conifer forest | [119] |
| 221 | 55.40  | 37.00   | 5.10  | 640.00  | 191.70 | temperate evergreen conifer forest | [120] |
| 222 | 55.33  | 37.17   | 5.10  | 640.00  | 191.95 | temperate evergreen conifer forest | [120] |
| 223 | 53.83  | 28.00   | 6.50  | 642.00  | 193.03 | temperate evergreen conifer forest | [120] |
| 224 | 48.17  | 24.75   | 5.00  | 876.00  | 194.05 | temperate evergreen conifer forest | [120] |
| 225 | 52.95  | -7.27   | 9.10  | 937.00  | 198.46 | temperate evergreen conifer forest | [120] |
| 226 | -28.35 | 152.66  | 18.30 | 1016.00 | 198.55 | temperate evergreen conifer forest | [116] |
| 227 | 36.78  | 139.93  | 10.50 | 1543.00 | 199.40 | temperate evergreen conifer forest | [121] |
| 228 | 47.38  | -122.20 | 11.30 | 1042.00 | 199.90 | temperate evergreen conifer forest | [121] |
| 229 | 27.82  | 100.60  | 7.20  | 848.00  | 202.60 | temperate evergreen conifer forest | [119] |
| 230 | 33.65  | 103.75  | 4.80  | 580.00  | 203.06 | temperate evergreen conifer forest | [119] |
| 231 | 31.22  | 115.87  | 14.10 | 1212.00 | 203.50 | temperate evergreen conifer forest | [102] |
| 232 | 33.33  | 131.00  | 12.30 | 2442.00 | 204.25 | temperate evergreen conifer forest | [121] |
| 233 | 30.00  | 101.00  | 4.40  | 709.00  | 204.70 | temperate evergreen conifer forest | [119] |
| 234 | 39.75  | 141.00  | 7.30  | 1442.00 | 207.30 | temperate evergreen conifer forest | [121] |
| 235 | -28.45 | 152.50  | 18.30 | 1016.00 | 210.20 | temperate evergreen conifer forest | [116] |
| 236 | 33.48  | 103.57  | 5.10  | 623.00  | 210.22 | temperate evergreen conifer forest | [119] |
| 237 | -30.59 | 152.74  | 17.10 | 1336.00 | 210.52 | temperate evergreen conifer forest | [116] |
| 238 | 48.49  | 24.57   | 5.00  | 876.00  | 210.88 | temperate evergreen conifer forest | [120] |
| 239 | -29.72 | 152.51  | 18.20 | 1243.00 | 210.95 | temperate evergreen conifer forest | [116] |
| 240 | -31.52 | 151.52  | 14.50 | 1017.00 | 215.07 | temperate evergreen conifer forest | [116] |
| 241 | 27.17  | 100.23  | 5.80  | 861.00  | 217.70 | temperate evergreen conifer forest | [119] |
| 242 | -37.11 | 147.28  | 9.70  | 1044.00 | 218.70 | temperate evergreen conifer forest | [116] |
| 243 | 36.00  | 139.13  | 13.00 | 1244.00 | 221.50 | temperate evergreen conifer forest | [121] |
| 244 | 27.90  | 101.20  | 11.10 | 899.00  | 223.70 | temperate evergreen conifer forest | [119] |
| 245 | -30.12 | 152.94  | 16.40 | 1319.00 | 226.15 | temperate evergreen conifer forest | [116] |

|     |        |         |       |         |        |                                    |       |
|-----|--------|---------|-------|---------|--------|------------------------------------|-------|
| 246 | 52.40  | -115.67 | -0.50 | 662.00  | 226.20 | temperate evergreen conifer forest | [119] |
| 247 | -37.28 | 149.15  | 12.10 | 780.00  | 229.37 | temperate evergreen conifer forest | [119] |
| 248 | -41.63 | 147.80  | 9.60  | 674.00  | 232.10 | temperate evergreen conifer forest | [116] |
| 249 | 47.00  | 9.00    | 7.50  | 1323.00 | 232.73 | temperate evergreen conifer forest | [120] |
| 250 | 49.61  | 32.06   | 8.10  | 552.00  | 232.93 | temperate evergreen conifer forest | [120] |
| 251 | -41.07 | 144.97  | 11.90 | 1200.00 | 234.50 | temperate evergreen conifer forest | [116] |
| 252 | 36.67  | 138.50  | 8.20  | 1492.00 | 235.10 | temperate evergreen conifer forest | [119] |
| 253 | 50.58  | 13.25   | 7.90  | 594.00  | 235.55 | temperate evergreen conifer forest | [120] |
| 254 | -35.30 | 148.64  | 11.90 | 843.00  | 238.25 | temperate evergreen conifer forest | [116] |
| 255 | -31.49 | 151.33  | 14.40 | 837.00  | 238.60 | temperate evergreen conifer forest | [116] |
| 256 | -36.69 | 146.99  | 12.00 | 1071.00 | 238.64 | temperate evergreen conifer forest | [116] |
| 257 | 35.00  | 138.00  | 8.10  | 1898.00 | 239.00 | temperate evergreen conifer forest | [121] |
| 258 | 50.20  | 11.88   | 7.20  | 650.00  | 239.13 | temperate evergreen conifer forest | [119] |
| 259 | 28.08  | 99.67   | 5.20  | 810.00  | 241.13 | temperate evergreen conifer forest | [102] |
| 260 | -36.70 | 149.93  | 14.20 | 822.00  | 243.30 | temperate evergreen conifer forest | [116] |
| 261 | 44.49  | -121.63 | 5.90  | 855.00  | 243.43 | temperate evergreen conifer forest | [119] |
| 262 | 48.55  | 24.60   | 7.90  | 680.00  | 244.79 | temperate evergreen conifer forest | [120] |
| 263 | 50.20  | 11.88   | 7.20  | 650.00  | 245.54 | temperate evergreen conifer forest | [120] |
| 264 | -31.12 | 152.79  | 17.50 | 1336.00 | 246.73 | temperate evergreen conifer forest | [116] |
| 265 | 41.90  | 44.20   | 7.40  | 727.00  | 247.53 | temperate evergreen conifer forest | [120] |
| 266 | -37.10 | 149.76  | 14.10 | 856.00  | 249.76 | temperate evergreen conifer forest | [116] |
| 267 | 33.50  | 133.50  | 12.40 | 2138.00 | 250.39 | temperate evergreen conifer forest | [121] |
| 268 | 50.50  | 13.00   | 7.90  | 594.00  | 251.25 | temperate evergreen conifer forest | [120] |
| 269 | 27.70  | 99.70   | 4.80  | 826.00  | 255.13 | temperate evergreen conifer forest | [119] |
| 270 | -29.56 | 152.04  | 15.40 | 1045.00 | 257.35 | temperate evergreen conifer forest | [116] |
| 271 | 48.02  | 20.45   | 8.70  | 653.00  | 257.50 | temperate evergreen conifer forest | [121] |
| 272 | 42.50  | -0.65   | 8.20  | 962.00  | 257.70 | temperate evergreen conifer forest | [121] |
| 273 | 51.82  | 9.58    | 8.00  | 722.00  | 262.42 | temperate evergreen conifer forest | [120] |
| 274 | -28.92 | 152.27  | 16.30 | 884.00  | 262.55 | temperate evergreen conifer forest | [116] |
| 275 | 31.40  | 103.10  | 10.30 | 809.00  | 263.25 | temperate evergreen conifer forest | [119] |
| 276 | 29.90  | 93.80   | 2.70  | 648.00  | 264.90 | temperate evergreen conifer forest | [119] |



|     |        |         |       |         |        |                                    |       |
|-----|--------|---------|-------|---------|--------|------------------------------------|-------|
| 277 | -37.06 | 149.80  | 14.10 | 856.00  | 265.04 | temperate evergreen conifer forest | [116] |
| 278 | 37.50  | 139.00  | 11.10 | 1692.00 | 265.65 | temperate evergreen conifer forest | [121] |
| 279 | 48.33  | 17.17   | 9.40  | 678.00  | 265.93 | temperate evergreen conifer forest | [120] |
| 280 | 29.00  | 101.35  | 0.10  | 752.00  | 266.90 | temperate evergreen conifer forest | [119] |
| 281 | 41.85  | 13.59   | 14.60 | 803.00  | 267.00 | temperate evergreen conifer forest | [119] |
| 282 | -31.37 | 151.66  | 12.50 | 1016.00 | 267.40 | temperate evergreen conifer forest | [116] |
| 283 | -30.02 | 152.43  | 14.20 | 1083.00 | 267.76 | temperate evergreen conifer forest | [116] |
| 284 | 31.60  | 103.80  | 11.40 | 799.00  | 268.20 | temperate evergreen conifer forest | [119] |
| 285 | -31.65 | 152.27  | 16.70 | 1157.00 | 271.90 | temperate evergreen conifer forest | [116] |
| 286 | 27.32  | 100.66  | 9.90  | 897.00  | 274.70 | temperate evergreen conifer forest | [119] |
| 287 | -30.54 | 152.85  | 17.10 | 1336.00 | 274.90 | temperate evergreen conifer forest | [116] |
| 288 | 31.50  | 103.27  | 4.30  | 704.00  | 275.05 | temperate evergreen conifer forest | [102] |
| 289 | 39.83  | -86.18  | 11.60 | 1009.00 | 276.10 | temperate evergreen conifer forest | [119] |
| 290 | -41.10 | 147.14  | 11.50 | 702.00  | 277.96 | temperate evergreen conifer forest | [116] |
| 291 | -38.24 | 143.24  | 15.10 | 808.00  | 279.90 | temperate evergreen conifer forest | [116] |
| 292 | 27.38  | 99.44   | 8.60  | 952.00  | 280.70 | temperate evergreen conifer forest | [119] |
| 293 | 27.45  | 98.96   | 10.50 | 1050.00 | 282.10 | temperate evergreen conifer forest | [119] |
| 294 | 28.62  | 98.65   | 3.30  | 766.00  | 282.20 | temperate evergreen conifer forest | [119] |
| 295 | -41.44 | 146.42  | 11.80 | 1108.00 | 282.60 | temperate evergreen conifer forest | [116] |
| 296 | -33.07 | 151.31  | 17.00 | 980.00  | 283.40 | temperate evergreen conifer forest | [116] |
| 297 | -26.58 | 152.85  | 19.20 | 1117.00 | 284.83 | temperate evergreen conifer forest | [116] |
| 298 | 56.83  | 49.83   | 3.30  | 570.00  | 284.95 | temperate evergreen conifer forest | [120] |
| 299 | -36.53 | 147.19  | 10.20 | 1098.00 | 290.10 | temperate evergreen conifer forest | [116] |
| 300 | 50.97  | 3.80    | 10.10 | 835.00  | 294.60 | temperate evergreen conifer forest | [120] |
| 301 | 33.16  | 132.99  | 14.10 | 2080.00 | 298.23 | temperate evergreen conifer forest | [121] |
| 302 | -29.09 | 152.46  | 15.20 | 983.00  | 300.07 | temperate evergreen conifer forest | [116] |
| 303 | -31.31 | 152.02  | 14.50 | 1164.00 | 300.80 | temperate evergreen conifer forest | [116] |
| 304 | 47.38  | -121.95 | 9.00  | 2325.00 | 303.82 | temperate evergreen conifer forest | [121] |
| 305 | 51.92  | 6.70    | 9.90  | 749.00  | 310.10 | temperate evergreen conifer forest | [120] |
| 306 | 31.00  | 101.10  | 3.80  | 646.00  | 310.30 | temperate evergreen conifer forest | [119] |
| 307 | 48.25  | 8.50    | 8.30  | 953.00  | 315.50 | temperate evergreen conifer forest | [120] |

|     |        |         |       |         |        |                                      |       |
|-----|--------|---------|-------|---------|--------|--------------------------------------|-------|
| 308 | -32.27 | 152.26  | 17.20 | 1165.00 | 317.23 | temperate evergreen conifer forest   | [116] |
| 309 | -32.02 | 152.34  | 17.20 | 1165.00 | 323.60 | temperate evergreen conifer forest   | [116] |
| 310 | 45.53  | -78.81  | 3.70  | 1006.00 | 325.90 | temperate evergreen conifer forest   | [121] |
| 311 | 50.29  | -114.57 | -1.20 | 734.00  | 331.77 | temperate evergreen conifer forest   | [119] |
| 312 | -36.01 | 149.86  | 12.50 | 877.00  | 332.86 | temperate evergreen conifer forest   | [116] |
| 313 | -40.50 | -73.50  | 9.80  | 1412.00 | 335.10 | temperate evergreen conifer forest   | [119] |
| 314 | 51.10  | 28.50   | 7.40  | 618.00  | 335.80 | temperate evergreen conifer forest   | [120] |
| 315 | 35.00  | 136.33  | 13.10 | 1715.00 | 339.00 | temperate evergreen conifer forest   | [121] |
| 316 | 45.23  | 23.17   | 7.80  | 811.00  | 339.60 | temperate evergreen conifer forest   | [120] |
| 317 | 49.52  | 14.98   | 7.70  | 659.00  | 347.40 | temperate evergreen conifer forest   | [120] |
| 318 | 32.00  | 103.00  | 8.50  | 710.00  | 353.30 | temperate evergreen conifer forest   | [119] |
| 319 | 43.50  | -122.00 | 7.80  | 984.00  | 372.90 | temperate evergreen conifer forest   | [119] |
| 320 | 28.18  | 98.96   | 4.10  | 828.00  | 385.10 | temperate evergreen conifer forest   | [119] |
| 321 | 27.82  | 99.26   | 9.30  | 928.00  | 390.50 | temperate evergreen conifer forest   | [119] |
| 322 | -35.61 | 148.22  | 10.50 | 1018.00 | 438.12 | temperate evergreen conifer forest   | [116] |
| 323 | -42.18 | 146.40  | 8.20  | 1496.00 | 447.80 | temperate evergreen conifer forest   | [116] |
| 324 | 37.45  | 56.32   | 15.90 | 132.00  | 15.40  | temperate evergreen broadleaf forest | [120] |
| 325 | 53.01  | 44.50   | 8.40  | 330.00  | 17.40  | temperate evergreen broadleaf forest | [120] |
| 326 | 36.27  | 113.16  | 9.50  | 547.00  | 35.70  | temperate evergreen broadleaf forest | [102] |
| 327 | 51.79  | 43.00   | 8.10  | 386.00  | 40.30  | temperate evergreen broadleaf forest | [120] |
| 328 | 49.00  | 33.50   | 8.30  | 528.00  | 41.61  | temperate evergreen broadleaf forest | [120] |
| 329 | 38.47  | 112.34  | 4.20  | 356.00  | 42.60  | temperate evergreen broadleaf forest | [102] |
| 330 | 41.22  | 121.86  | 8.90  | 581.00  | 46.90  | temperate evergreen broadleaf forest | [102] |
| 331 | 48.81  | 7.78    | 10.40 | 647.00  | 47.00  | temperate evergreen broadleaf forest | [122] |
| 332 | 35.67  | 45.25   | 16.00 | 420.00  | 47.90  | temperate evergreen broadleaf forest | [120] |
| 333 | 38.68  | 112.18  | 4.20  | 471.00  | 52.20  | temperate evergreen broadleaf forest | [102] |
| 334 | 48.64  | 31.86   | 8.70  | 482.00  | 53.13  | temperate evergreen broadleaf forest | [120] |
| 335 | 51.17  | 40.42   | 8.70  | 280.00  | 53.70  | temperate evergreen broadleaf forest | [120] |
| 336 | 38.54  | 117.43  | 12.20 | 577.00  | 55.00  | temperate evergreen broadleaf forest | [102] |
| 337 | 30.87  | 110.97  | 14.10 | 1110.00 | 57.85  | temperate evergreen broadleaf forest | [102] |
| 338 | -35.42 | -70.78  | 16.50 | 605.00  | 59.70  | temperate evergreen broadleaf forest | [125] |

|     |        |        |       |         |       |                                      |       |
|-----|--------|--------|-------|---------|-------|--------------------------------------|-------|
| 339 | 35.75  | 139.50 | 14.60 | 1444.00 | 60.22 | temperate evergreen broadleaf forest | [121] |
| 340 | 54.00  | 27.00  | 6.30  | 653.00  | 61.83 | temperate evergreen broadleaf forest | [120] |
| 341 | 27.86  | 113.18 | 17.80 | 1452.00 | 62.43 | temperate evergreen broadleaf forest | [102] |
| 342 | 47.62  | 124.92 | 2.70  | 437.00  | 64.02 | temperate evergreen broadleaf forest | [102] |
| 343 | 43.50  | 27.00  | 11.20 | 538.00  | 64.30 | temperate evergreen broadleaf forest | [120] |
| 344 | 52.00  | 39.00  | 5.90  | 533.00  | 66.08 | temperate evergreen broadleaf forest | [120] |
| 345 | 34.82  | 108.13 | 11.90 | 617.00  | 67.10 | temperate evergreen broadleaf forest | [102] |
| 346 | 51.67  | 39.33  | 6.30  | 542.00  | 67.35 | temperate evergreen broadleaf forest | [120] |
| 347 | 56.00  | 78.00  | 0.20  | 428.00  | 67.53 | temperate evergreen broadleaf forest | [120] |
| 348 | 49.00  | 9.00   | 9.50  | 629.00  | 69.10 | temperate evergreen broadleaf forest | [120] |
| 349 | 45.60  | 28.14  | 11.20 | 436.00  | 69.30 | temperate evergreen broadleaf forest | [120] |
| 350 | 39.98  | 116.27 | 12.20 | 498.00  | 69.84 | temperate evergreen broadleaf forest | [102] |
| 351 | 36.97  | 109.03 | 9.10  | 456.00  | 71.63 | temperate evergreen broadleaf forest | [102] |
| 352 | 39.97  | 117.02 | 12.40 | 505.00  | 72.20 | temperate evergreen broadleaf forest | [102] |
| 353 | 27.35  | 113.08 | 17.70 | 1459.00 | 73.43 | temperate evergreen broadleaf forest | [102] |
| 354 | 55.00  | 24.00  | 6.70  | 604.00  | 74.53 | temperate evergreen broadleaf forest | [120] |
| 355 | 45.00  | 34.17  | 11.20 | 460.00  | 74.80 | temperate evergreen broadleaf forest | [120] |
| 356 | -36.53 | 144.43 | 15.70 | 424.00  | 75.00 | temperate evergreen broadleaf forest | [116] |
| 357 | 48.50  | 31.54  | 8.90  | 443.00  | 77.09 | temperate evergreen broadleaf forest | [120] |
| 358 | -25.36 | 151.69 | 20.00 | 622.00  | 77.85 | temperate evergreen broadleaf forest | [116] |
| 359 | 50.85  | 27.25  | 8.00  | 564.00  | 78.15 | temperate evergreen broadleaf forest | [120] |
| 360 | 27.67  | 114.63 | 18.10 | 1559.00 | 78.56 | temperate evergreen broadleaf forest | [102] |
| 361 | 52.50  | 1.22   | 9.60  | 660.00  | 78.73 | temperate evergreen broadleaf forest | [121] |
| 362 | 49.32  | 16.67  | 8.20  | 593.00  | 81.58 | temperate evergreen broadleaf forest | [120] |
| 363 | 31.87  | 118.87 | 15.70 | 1120.00 | 81.70 | temperate evergreen broadleaf forest | [102] |
| 364 | 58.30  | 26.50  | 5.00  | 602.00  | 82.10 | temperate evergreen broadleaf forest | [120] |
| 365 | 51.67  | 31.99  | 7.30  | 600.00  | 82.20 | temperate evergreen broadleaf forest | [120] |
| 366 | 52.50  | 0.88   | 9.20  | 706.00  | 83.83 | temperate evergreen broadleaf forest | [120] |
| 367 | 51.45  | 94.30  | -3.00 | 545.00  | 85.15 | temperate evergreen broadleaf forest | [120] |
| 368 | 35.00  | 137.00 | 13.70 | 1657.00 | 89.15 | temperate evergreen broadleaf forest | [120] |
| 369 | 52.33  | 20.83  | 8.30  | 516.00  | 89.92 | temperate evergreen broadleaf forest | [120] |

|     |        |        |       |         |        |                                      |       |
|-----|--------|--------|-------|---------|--------|--------------------------------------|-------|
| 370 | 56.12  | 73.30  | 1.00  | 386.00  | 94.23  | temperate evergreen broadleaf forest | [120] |
| 371 | 56.09  | 37.49  | 4.60  | 685.00  | 95.20  | temperate evergreen broadleaf forest | [120] |
| 372 | 56.33  | 43.50  | 4.30  | 612.00  | 95.82  | temperate evergreen broadleaf forest | [120] |
| 373 | 36.00  | 137.50 | 7.90  | 1509.00 | 96.70  | temperate evergreen broadleaf forest | [120] |
| 374 | 56.33  | 36.33  | 4.60  | 691.00  | 96.84  | temperate evergreen broadleaf forest | [120] |
| 375 | -26.03 | 152.67 | 19.70 | 684.00  | 98.40  | temperate evergreen broadleaf forest | [116] |
| 376 | 52.57  | 4.65   | 9.60  | 760.00  | 99.00  | temperate evergreen broadleaf forest | [120] |
| 377 | 48.60  | 32.37  | 8.50  | 457.00  | 99.50  | temperate evergreen broadleaf forest | [120] |
| 378 | 36.00  | 138.00 | 7.90  | 1363.00 | 100.24 | temperate evergreen broadleaf forest | [120] |
| 379 | 32.13  | 114.01 | 15.90 | 998.00  | 100.30 | temperate evergreen broadleaf forest | [102] |
| 380 | 42.52  | 125.42 | 5.70  | 712.00  | 101.90 | temperate evergreen broadleaf forest | [102] |
| 381 | 50.55  | 30.35  | 8.10  | 620.00  | 102.20 | temperate evergreen broadleaf forest | [120] |
| 382 | 31.55  | 117.96 | 15.90 | 1107.00 | 102.90 | temperate evergreen broadleaf forest | [102] |
| 383 | 50.30  | 27.00  | 8.50  | 523.00  | 103.90 | temperate evergreen broadleaf forest | [120] |
| 384 | 51.76  | 33.63  | 6.80  | 601.00  | 104.70 | temperate evergreen broadleaf forest | [120] |
| 385 | -25.84 | 152.37 | 19.70 | 684.00  | 105.90 | temperate evergreen broadleaf forest | [116] |
| 386 | 50.25  | 36.64  | 9.40  | 503.00  | 106.86 | temperate evergreen broadleaf forest | [120] |
| 387 | -26.06 | 152.39 | 19.70 | 684.00  | 107.20 | temperate evergreen broadleaf forest | [116] |
| 388 | 31.30  | 104.53 | 16.60 | 925.00  | 108.60 | temperate evergreen broadleaf forest | [102] |
| 389 | 36.50  | 138.00 | 7.80  | 1403.00 | 109.23 | temperate evergreen broadleaf forest | [120] |
| 390 | 56.30  | 37.00  | 4.60  | 685.00  | 109.70 | temperate evergreen broadleaf forest | [120] |
| 391 | 39.03  | 141.35 | 9.30  | 1433.00 | 113.91 | temperate evergreen broadleaf forest | [120] |
| 392 | 52.48  | -0.25  | 9.50  | 604.00  | 114.43 | temperate evergreen broadleaf forest | [120] |
| 393 | 32.12  | 118.98 | 15.30 | 1039.00 | 114.70 | temperate evergreen broadleaf forest | [102] |
| 394 | 51.00  | 30.00  | 7.90  | 611.00  | 116.32 | temperate evergreen broadleaf forest | [120] |
| 395 | 54.33  | 26.50  | 6.20  | 653.00  | 116.45 | temperate evergreen broadleaf forest | [120] |
| 396 | 36.72  | 112.05 | 7.70  | 512.00  | 117.10 | temperate evergreen broadleaf forest | [102] |
| 397 | 36.50  | 138.17 | 7.80  | 1403.00 | 117.50 | temperate evergreen broadleaf forest | [120] |
| 398 | 54.83  | 28.00  | 6.00  | 658.00  | 120.40 | temperate evergreen broadleaf forest | [120] |
| 399 | 54.00  | 27.50  | 6.00  | 673.00  | 120.44 | temperate evergreen broadleaf forest | [120] |
| 400 | 34.54  | 114.52 | 14.60 | 656.00  | 120.73 | temperate evergreen broadleaf forest | [102] |

|     |        |        |       |         |        |                                      |       |
|-----|--------|--------|-------|---------|--------|--------------------------------------|-------|
| 401 | 51.73  | 25.90  | 7.40  | 584.00  | 121.97 | temperate evergreen broadleaf forest | [120] |
| 402 | 45.00  | 20.50  | 12.00 | 599.00  | 123.07 | temperate evergreen broadleaf forest | [120] |
| 403 | 50.81  | 26.18  | 7.60  | 570.00  | 123.10 | temperate evergreen broadleaf forest | [120] |
| 404 | 49.50  | 128.40 | -0.80 | 566.00  | 123.50 | temperate evergreen broadleaf forest | [119] |
| 405 | 57.17  | -2.17  | 7.80  | 850.00  | 124.06 | temperate evergreen broadleaf forest | [120] |
| 406 | 49.00  | 32.00  | 8.20  | 531.00  | 125.44 | temperate evergreen broadleaf forest | [120] |
| 407 | 35.00  | 140.00 | 15.00 | 1858.00 | 125.50 | temperate evergreen broadleaf forest | [120] |
| 408 | 44.43  | 39.42  | 9.40  | 503.00  | 127.20 | temperate evergreen broadleaf forest | [120] |
| 409 | 52.76  | -0.25  | 9.30  | 638.00  | 129.13 | temperate evergreen broadleaf forest | [121] |
| 410 | 48.50  | 19.67  | 5.20  | 943.00  | 129.17 | temperate evergreen broadleaf forest | [120] |
| 411 | 48.73  | 32.32  | 8.20  | 488.00  | 130.03 | temperate evergreen broadleaf forest | [120] |
| 412 | 52.67  | 1.33   | 9.60  | 660.00  | 130.40 | temperate evergreen broadleaf forest | [120] |
| 413 | 51.40  | 42.00  | 6.40  | 444.00  | 130.90 | temperate evergreen broadleaf forest | [120] |
| 414 | -25.63 | 151.93 | 20.00 | 622.00  | 131.00 | temperate evergreen broadleaf forest | [116] |
| 415 | 53.75  | 13.25  | 8.70  | 586.00  | 131.39 | temperate evergreen broadleaf forest | [120] |
| 416 | 42.54  | 80.85  | 1.40  | 370.00  | 131.61 | temperate evergreen broadleaf forest | [120] |
| 417 | 51.00  | 26.00  | 7.70  | 583.00  | 134.25 | temperate evergreen broadleaf forest | [120] |
| 418 | 49.00  | 24.58  | 7.60  | 682.00  | 136.73 | temperate evergreen broadleaf forest | [120] |
| 419 | 31.67  | 131.33 | 15.70 | 2633.00 | 140.53 | temperate evergreen broadleaf forest | [120] |
| 420 | 51.66  | 26.00  | 7.40  | 591.00  | 142.13 | temperate evergreen broadleaf forest | [120] |
| 421 | 35.00  | 136.00 | 13.10 | 1715.00 | 143.61 | temperate evergreen broadleaf forest | [120] |
| 422 | 57.54  | 53.00  | 2.30  | 583.00  | 143.87 | temperate evergreen broadleaf forest | [120] |
| 423 | 54.17  | 27.50  | 6.00  | 673.00  | 144.59 | temperate evergreen broadleaf forest | [120] |
| 424 | 35.50  | 138.67 | 7.90  | 1640.00 | 144.60 | temperate evergreen broadleaf forest | [120] |
| 425 | 34.73  | 136.20 | 13.30 | 1626.00 | 145.63 | temperate evergreen broadleaf forest | [120] |
| 426 | 54.00  | 44.00  | 4.70  | 551.00  | 148.30 | temperate evergreen broadleaf forest | [120] |
| 427 | 56.25  | 76.35  | 0.50  | 419.00  | 148.50 | temperate evergreen broadleaf forest | [120] |
| 428 | 51.32  | 26.69  | 7.80  | 593.00  | 149.05 | temperate evergreen broadleaf forest | [120] |
| 429 | 55.50  | 55.50  | 3.00  | 560.00  | 149.48 | temperate evergreen broadleaf forest | [120] |
| 430 | 42.83  | 78.84  | 1.30  | 370.00  | 151.32 | temperate evergreen broadleaf forest | [120] |
| 431 | 50.50  | 30.70  | 8.20  | 607.00  | 151.60 | temperate evergreen broadleaf forest | [120] |

|     |       |        |       |         |        |                                      |       |
|-----|-------|--------|-------|---------|--------|--------------------------------------|-------|
| 432 | 51.83 | 39.58  | 6.30  | 510.00  | 152.30 | temperate evergreen broadleaf forest | [120] |
| 433 | 36.00 | 139.00 | 13.00 | 1244.00 | 152.60 | temperate evergreen broadleaf forest | [120] |
| 434 | 43.50 | 24.00  | 11.90 | 553.00  | 152.73 | temperate evergreen broadleaf forest | [120] |
| 435 | 51.00 | 24.00  | 7.90  | 565.00  | 152.83 | temperate evergreen broadleaf forest | [120] |
| 436 | 53.00 | 42.00  | 5.20  | 529.00  | 153.01 | temperate evergreen broadleaf forest | [120] |
| 437 | 52.09 | 31.41  | 7.00  | 606.00  | 153.15 | temperate evergreen broadleaf forest | [120] |
| 438 | 44.00 | 142.50 | 4.10  | 1072.00 | 153.95 | temperate evergreen broadleaf forest | [120] |
| 439 | 43.34 | 77.85  | 10.20 | 341.00  | 156.23 | temperate evergreen broadleaf forest | [120] |
| 440 | 36.83 | 139.67 | 10.50 | 1543.00 | 156.34 | temperate evergreen broadleaf forest | [120] |
| 441 | 50.00 | 27.00  | 8.50  | 523.00  | 156.76 | temperate evergreen broadleaf forest | [120] |
| 442 | 45.00 | 25.00  | 6.30  | 876.00  | 157.50 | temperate evergreen broadleaf forest | [120] |
| 443 | 32.83 | 130.67 | 14.80 | 2353.00 | 158.87 | temperate evergreen broadleaf forest | [120] |
| 444 | 51.50 | 31.67  | 7.30  | 600.00  | 159.58 | temperate evergreen broadleaf forest | [120] |
| 445 | 51.50 | 32.30  | 7.10  | 604.00  | 159.83 | temperate evergreen broadleaf forest | [120] |
| 446 | 56.00 | 36.45  | 4.60  | 691.00  | 160.60 | temperate evergreen broadleaf forest | [120] |
| 447 | 27.53 | 98.96  | 7.20  | 924.00  | 161.40 | temperate evergreen broadleaf forest | [119] |
| 448 | 56.50 | 36.75  | 4.50  | 684.00  | 161.78 | temperate evergreen broadleaf forest | [120] |
| 449 | 59.75 | 30.50  | 4.70  | 630.00  | 164.27 | temperate evergreen broadleaf forest | [120] |
| 450 | 55.83 | 39.00  | 4.70  | 589.00  | 166.08 | temperate evergreen broadleaf forest | [120] |
| 451 | 51.75 | 9.60   | 8.00  | 722.00  | 167.10 | temperate evergreen broadleaf forest | [121] |
| 452 | 47.50 | 8.75   | 8.80  | 992.00  | 167.40 | temperate evergreen broadleaf forest | [120] |
| 453 | 50.47 | 22.98  | 8.30  | 610.00  | 168.60 | temperate evergreen broadleaf forest | [119] |
| 454 | 49.50 | 27.50  | 8.30  | 535.00  | 168.79 | temperate evergreen broadleaf forest | [120] |
| 455 | 49.25 | 34.90  | 8.80  | 498.00  | 170.20 | temperate evergreen broadleaf forest | [120] |
| 456 | 50.45 | 30.30  | 8.30  | 617.00  | 171.30 | temperate evergreen broadleaf forest | [120] |
| 457 | 56.50 | 52.00  | 2.90  | 557.00  | 173.05 | temperate evergreen broadleaf forest | [120] |
| 458 | 51.95 | 31.83  | 7.30  | 600.00  | 173.16 | temperate evergreen broadleaf forest | [120] |
| 459 | 51.00 | 28.00  | 7.40  | 614.00  | 173.76 | temperate evergreen broadleaf forest | [120] |
| 460 | 54.00 | 27.58  | 6.00  | 673.00  | 173.83 | temperate evergreen broadleaf forest | [120] |
| 461 | 51.51 | 25.74  | 7.40  | 584.00  | 174.30 | temperate evergreen broadleaf forest | [120] |
| 462 | 55.00 | 37.50  | 5.10  | 623.00  | 174.63 | temperate evergreen broadleaf forest | [120] |

|     |        |        |       |         |        |                                      |       |
|-----|--------|--------|-------|---------|--------|--------------------------------------|-------|
| 463 | 47.33  | -94.50 | 4.30  | 631.00  | 175.00 | temperate evergreen broadleaf forest | [121] |
| 464 | 42.04  | 124.10 | 5.90  | 727.00  | 175.04 | temperate evergreen broadleaf forest | [102] |
| 465 | -27.63 | 153.09 | 19.70 | 1280.00 | 175.80 | temperate evergreen broadleaf forest | [116] |
| 466 | 33.08  | 130.85 | 14.70 | 2085.00 | 175.88 | temperate evergreen broadleaf forest | [120] |
| 467 | 56.67  | 49.00  | 3.40  | 573.00  | 175.96 | temperate evergreen broadleaf forest | [120] |
| 468 | 54.75  | 56.17  | 3.40  | 526.00  | 176.63 | temperate evergreen broadleaf forest | [120] |
| 469 | 47.30  | 28.30  | 9.50  | 554.00  | 179.63 | temperate evergreen broadleaf forest | [120] |
| 470 | 47.83  | 7.67   | 8.50  | 1111.00 | 179.66 | temperate evergreen broadleaf forest | [120] |
| 471 | 49.44  | 29.65  | 7.70  | 604.00  | 179.75 | temperate evergreen broadleaf forest | [120] |
| 472 | 34.92  | 132.11 | 12.60 | 1825.00 | 183.16 | temperate evergreen broadleaf forest | [120] |
| 473 | 50.00  | 24.50  | 7.50  | 652.00  | 184.30 | temperate evergreen broadleaf forest | [120] |
| 474 | 35.00  | 138.00 | 8.10  | 1898.00 | 184.74 | temperate evergreen broadleaf forest | [120] |
| 475 | 34.50  | 136.50 | 15.40 | 1783.00 | 185.58 | temperate evergreen broadleaf forest | [120] |
| 476 | 54.30  | 38.50  | 4.80  | 553.00  | 186.10 | temperate evergreen broadleaf forest | [120] |
| 477 | 54.50  | 44.00  | 4.50  | 572.00  | 186.91 | temperate evergreen broadleaf forest | [120] |
| 478 | 50.20  | 27.10  | 8.50  | 523.00  | 187.37 | temperate evergreen broadleaf forest | [120] |
| 479 | 51.80  | 32.53  | 6.90  | 610.00  | 187.45 | temperate evergreen broadleaf forest | [120] |
| 480 | 52.07  | 31.86  | 6.90  | 609.00  | 187.93 | temperate evergreen broadleaf forest | [120] |
| 481 | 51.48  | 25.79  | 7.60  | 583.00  | 189.60 | temperate evergreen broadleaf forest | [120] |
| 482 | 49.40  | 35.20  | 8.70  | 520.00  | 190.55 | temperate evergreen broadleaf forest | [120] |
| 483 | 57.00  | 84.00  | 0.00  | 518.00  | 190.80 | temperate evergreen broadleaf forest | [120] |
| 484 | 50.50  | 29.50  | 7.80  | 617.00  | 191.32 | temperate evergreen broadleaf forest | [120] |
| 485 | 51.20  | 42.00  | 6.40  | 444.00  | 192.88 | temperate evergreen broadleaf forest | [120] |
| 486 | 35.33  | 135.75 | 12.90 | 1731.00 | 193.08 | temperate evergreen broadleaf forest | [120] |
| 487 | 44.70  | 129.70 | 2.80  | 555.00  | 193.40 | temperate evergreen broadleaf forest | [119] |
| 488 | 50.31  | 30.18  | 8.30  | 617.00  | 193.90 | temperate evergreen broadleaf forest | [120] |
| 489 | 56.00  | -4.00  | 6.70  | 1951.00 | 193.93 | temperate evergreen broadleaf forest | [120] |
| 490 | 51.80  | 31.98  | 7.30  | 600.00  | 196.56 | temperate evergreen broadleaf forest | [120] |
| 491 | 51.55  | 26.00  | 7.40  | 591.00  | 196.90 | temperate evergreen broadleaf forest | [120] |
| 492 | 53.00  | 26.00  | 6.80  | 607.00  | 196.98 | temperate evergreen broadleaf forest | [120] |
| 493 | 51.29  | 26.48  | 7.70  | 583.00  | 199.10 | temperate evergreen broadleaf forest | [120] |

|     |        |        |       |         |        |                                      |       |
|-----|--------|--------|-------|---------|--------|--------------------------------------|-------|
| 494 | 54.20  | 38.00  | 5.00  | 565.00  | 201.02 | temperate evergreen broadleaf forest | [120] |
| 495 | 54.50  | 38.83  | 4.70  | 581.00  | 202.30 | temperate evergreen broadleaf forest | [120] |
| 496 | 51.64  | 33.91  | 6.80  | 601.00  | 203.60 | temperate evergreen broadleaf forest | [120] |
| 497 | 41.77  | 14.37  | 13.40 | 690.00  | 205.95 | temperate evergreen broadleaf forest | [120] |
| 498 | 27.02  | 100.35 | 5.80  | 861.00  | 208.60 | temperate evergreen broadleaf forest | [119] |
| 499 | 47.50  | 28.50  | 9.30  | 539.00  | 209.00 | temperate evergreen broadleaf forest | [120] |
| 500 | 51.33  | 42.00  | 6.40  | 444.00  | 210.74 | temperate evergreen broadleaf forest | [120] |
| 501 | 50.17  | 37.79  | 8.60  | 509.00  | 212.30 | temperate evergreen broadleaf forest | [120] |
| 502 | 26.80  | 100.20 | 8.80  | 917.00  | 222.90 | temperate evergreen broadleaf forest | [119] |
| 503 | 36.00  | 139.13 | 13.00 | 1244.00 | 223.30 | temperate evergreen broadleaf forest | [120] |
| 504 | -37.75 | 144.07 | 13.10 | 651.00  | 231.00 | temperate evergreen broadleaf forest | [116] |
| 505 | 50.00  | 26.30  | 8.00  | 536.00  | 233.26 | temperate evergreen broadleaf forest | [120] |
| 506 | 33.50  | 133.50 | 12.40 | 2138.00 | 233.74 | temperate evergreen broadleaf forest | [120] |
| 507 | 55.67  | 37.00  | 5.00  | 658.00  | 235.35 | temperate evergreen broadleaf forest | [120] |
| 508 | 48.18  | 17.90  | 9.70  | 604.00  | 236.55 | temperate evergreen broadleaf forest | [121] |
| 509 | 52.00  | 28.00  | 7.20  | 623.00  | 242.84 | temperate evergreen broadleaf forest | [120] |
| 510 | 48.43  | 99.88  | -5.70 | 289.00  | 242.90 | temperate evergreen broadleaf forest | [120] |
| 511 | 50.00  | 25.00  | 7.20  | 644.00  | 244.24 | temperate evergreen broadleaf forest | [120] |
| 512 | 48.33  | 1.17   | 10.50 | 627.00  | 244.80 | temperate evergreen broadleaf forest | [120] |
| 513 | 56.00  | 82.83  | 0.40  | 488.00  | 244.90 | temperate evergreen broadleaf forest | [120] |
| 514 | 42.50  | -0.67  | 8.20  | 962.00  | 246.20 | temperate evergreen broadleaf forest | [120] |
| 515 | -37.57 | 146.68 | 11.40 | 979.00  | 246.65 | temperate evergreen broadleaf forest | [116] |
| 516 | 51.33  | 33.92  | 7.10  | 586.00  | 247.90 | temperate evergreen broadleaf forest | [120] |
| 517 | 36.67  | 138.50 | 8.20  | 1492.00 | 249.90 | temperate evergreen broadleaf forest | [120] |
| 518 | 50.20  | 30.00  | 8.30  | 617.00  | 252.20 | temperate evergreen broadleaf forest | [120] |
| 519 | 37.00  | 140.67 | 10.90 | 1349.00 | 254.29 | temperate evergreen broadleaf forest | [120] |
| 520 | -27.36 | 152.76 | 19.30 | 1025.00 | 254.55 | temperate evergreen broadleaf forest | [116] |
| 521 | 52.50  | 24.20  | 7.40  | 568.00  | 254.70 | temperate evergreen broadleaf forest | [120] |
| 522 | 52.00  | 30.00  | 7.10  | 625.00  | 258.97 | temperate evergreen broadleaf forest | [120] |
| 523 | 35.80  | 137.83 | 6.00  | 1812.00 | 264.93 | temperate evergreen broadleaf forest | [120] |
| 524 | 41.87  | 13.63  | 14.60 | 803.00  | 267.80 | temperate evergreen broadleaf forest | [120] |



|     |        |        |       |         |        |                                      |       |
|-----|--------|--------|-------|---------|--------|--------------------------------------|-------|
| 525 | 35.93  | 138.85 | 7.90  | 1640.00 | 274.00 | temperate evergreen broadleaf forest | [120] |
| 526 | 50.93  | 13.46  | 7.90  | 594.00  | 274.70 | temperate evergreen broadleaf forest | [119] |
| 527 | 37.50  | 139.00 | 11.10 | 1692.00 | 275.93 | temperate evergreen broadleaf forest | [120] |
| 528 | 29.71  | 94.40  | 2.70  | 658.00  | 277.40 | temperate evergreen broadleaf forest | [102] |
| 529 | 34.07  | 135.50 | 12.40 | 2197.00 | 279.27 | temperate evergreen broadleaf forest | [120] |
| 530 | 50.25  | 24.30  | 7.70  | 656.00  | 280.20 | temperate evergreen broadleaf forest | [120] |
| 531 | 51.00  | 13.50  | 9.30  | 536.00  | 283.60 | temperate evergreen broadleaf forest | [120] |
| 532 | 54.00  | 25.33  | 6.60  | 642.00  | 295.60 | temperate evergreen broadleaf forest | [120] |
| 533 | 54.67  | 25.00  | 6.50  | 650.00  | 298.50 | temperate evergreen broadleaf forest | [120] |
| 534 | 55.73  | 13.30  | 7.90  | 647.00  | 299.13 | temperate evergreen broadleaf forest | [120] |
| 535 | 50.42  | 24.50  | 7.50  | 652.00  | 303.00 | temperate evergreen broadleaf forest | [120] |
| 536 | 48.20  | 7.18   | 8.80  | 917.00  | 308.90 | temperate evergreen broadleaf forest | [120] |
| 537 | 53.00  | -6.50  | 9.50  | 799.00  | 310.20 | temperate evergreen broadleaf forest | [121] |
| 538 | 44.20  | 3.68   | 13.10 | 776.00  | 310.50 | temperate evergreen broadleaf forest | [121] |
| 539 | -33.33 | 151.36 | 17.00 | 980.00  | 313.90 | temperate evergreen broadleaf forest | [116] |
| 540 | 56.00  | 24.00  | 6.50  | 594.00  | 315.50 | temperate evergreen broadleaf forest | [120] |
| 541 | 48.25  | 11.67  | 8.40  | 775.00  | 317.25 | temperate evergreen broadleaf forest | [120] |
| 542 | 49.92  | 16.25  | 7.40  | 714.00  | 317.60 | temperate evergreen broadleaf forest | [120] |
| 543 | 44.09  | 3.50   | 13.10 | 776.00  | 319.00 | temperate evergreen broadleaf forest | [120] |
| 544 | 53.00  | -6.22  | 9.20  | 943.00  | 324.80 | temperate evergreen broadleaf forest | [120] |
| 545 | 53.33  | 30.83  | 6.30  | 619.00  | 325.07 | temperate evergreen broadleaf forest | [120] |
| 546 | 29.50  | 80.83  | 11.80 | 1059.00 | 344.47 | temperate evergreen broadleaf forest | [120] |
| 547 | 42.00  | 23.00  | 7.70  | 694.00  | 357.50 | temperate evergreen broadleaf forest | [121] |
| 548 | 51.50  | 10.00  | 8.00  | 658.00  | 390.49 | temperate evergreen broadleaf forest | [120] |
| 549 | 55.98  | 13.17  | 7.90  | 647.00  | 399.00 | temperate evergreen broadleaf forest | [120] |
| 550 | 49.00  | 15.00  | 7.30  | 704.00  | 484.90 | temperate evergreen broadleaf forest | [120] |
| 551 | -42.01 | 146.52 | 8.80  | 998.00  | 262.10 | temperate deciduous forest           | [116] |
| 552 | -37.15 | 142.41 | 12.70 | 592.00  | 156.50 | temperate deciduous forest           | [116] |
| 553 | -32.33 | 148.23 | 17.50 | 539.00  | 72.35  | temperate deciduous forest           | [121] |
| 554 | -28.86 | 150.90 | 18.80 | 634.00  | 53.90  | temperate deciduous forest           | [116] |
| 555 | 32.12  | 118.95 | 15.30 | 1039.00 | 64.84  | temperate deciduous forest           | [102] |

|     |       |         |       |         |        |                            |       |
|-----|-------|---------|-------|---------|--------|----------------------------|-------|
| 556 | 35.00 | 136.33  | 13.10 | 1715.00 | 184.00 | temperate deciduous forest | [121] |
| 557 | 35.00 | 138.00  | 8.10  | 1898.00 | 185.00 | temperate deciduous forest | [121] |
| 558 | 36.85 | 138.68  | 8.20  | 1492.00 | 330.76 | temperate deciduous forest | [120] |
| 559 | 37.10 | 128.92  | 8.10  | 1391.00 | 145.10 | temperate deciduous forest | [120] |
| 560 | 37.50 | 127.50  | 9.50  | 1260.00 | 283.44 | temperate deciduous forest | [120] |
| 561 | 37.52 | -89.32  | 13.90 | 1145.00 | 322.30 | temperate deciduous forest | [119] |
| 562 | 37.72 | -83.80  | 13.10 | 1174.00 | 405.90 | temperate deciduous forest | [119] |
| 563 | 40.50 | 123.20  | 5.90  | 775.00  | 140.70 | temperate deciduous forest | [119] |
| 564 | 40.88 | 123.91  | 6.10  | 841.00  | 154.56 | temperate deciduous forest | [102] |
| 565 | 41.41 | 123.98  | 7.00  | 787.00  | 120.60 | temperate deciduous forest | [102] |
| 566 | 41.50 | 140.02  | 7.70  | 1321.00 | 213.18 | temperate deciduous forest | [121] |
| 567 | 41.80 | 126.90  | 4.20  | 852.00  | 172.60 | temperate deciduous forest | [119] |
| 568 | 42.17 | 43.00   | 9.20  | 853.00  | 217.15 | temperate deciduous forest | [120] |
| 569 | 42.20 | 127.30  | 3.30  | 795.00  | 271.10 | temperate deciduous forest | [119] |
| 570 | 42.28 | 128.00  | 0.80  | 861.00  | 283.60 | temperate deciduous forest | [102] |
| 571 | 42.30 | 127.20  | 3.30  | 795.00  | 149.10 | temperate deciduous forest | [119] |
| 572 | 42.42 | 128.20  | 0.80  | 861.00  | 233.46 | temperate deciduous forest | [119] |
| 573 | 42.46 | 73.39   | 1.90  | 318.00  | 84.10  | temperate deciduous forest | [120] |
| 574 | 42.47 | -123.27 | 10.30 | 892.00  | 972.30 | temperate deciduous forest | [119] |
| 575 | 42.50 | 23.00   | 9.50  | 630.00  | 204.17 | temperate deciduous forest | [120] |
| 576 | 42.50 | 24.00   | 8.60  | 680.00  | 357.50 | temperate deciduous forest | [120] |
| 577 | 42.51 | 74.88   | 1.40  | 332.00  | 71.60  | temperate deciduous forest | [120] |
| 578 | 42.59 | 12.98   | 8.40  | 897.00  | 180.80 | temperate deciduous forest | [120] |
| 579 | 42.68 | 129.53  | 2.90  | 681.00  | 91.10  | temperate deciduous forest | [102] |
| 580 | 42.69 | 78.96   | 1.80  | 319.00  | 48.37  | temperate deciduous forest | [120] |
| 581 | 43.00 | 24.00   | 11.20 | 573.00  | 133.75 | temperate deciduous forest | [120] |
| 582 | 43.00 | 27.50   | 11.80 | 528.00  | 116.87 | temperate deciduous forest | [120] |
| 583 | 43.17 | -4.17   | 11.30 | 963.00  | 304.60 | temperate deciduous forest | [120] |
| 584 | 43.22 | 142.45  | 4.60  | 1204.00 | 156.00 | temperate deciduous forest | [120] |
| 585 | 43.25 | 25.00   | 11.20 | 585.00  | 78.95  | temperate deciduous forest | [120] |
| 586 | 43.30 | 129.70  | 2.50  | 629.00  | 176.95 | temperate deciduous forest | [119] |

|     |       |        |       |         |        |                            |       |
|-----|-------|--------|-------|---------|--------|----------------------------|-------|
| 587 | 43.30 | 134.00 | 3.10  | 878.00  | 150.78 | temperate deciduous forest | [120] |
| 588 | 43.50 | 134.00 | 0.90  | 855.00  | 141.20 | temperate deciduous forest | [120] |
| 589 | 43.91 | -71.66 | 5.50  | 1087.00 | 159.13 | temperate deciduous forest | [121] |
| 590 | 43.94 | 11.63  | 9.40  | 795.00  | 341.29 | temperate deciduous forest | [120] |
| 591 | 44.00 | -71.50 | 3.00  | 1325.00 | 157.40 | temperate deciduous forest | [121] |
| 592 | 44.00 | 133.00 | 3.50  | 715.00  | 246.23 | temperate deciduous forest | [120] |
| 593 | 44.00 | 134.00 | 1.70  | 777.00  | 210.20 | temperate deciduous forest | [120] |
| 594 | 44.06 | -71.29 | 2.90  | 1390.00 | 264.00 | temperate deciduous forest | [119] |
| 595 | 44.10 | 130.20 | 2.00  | 590.00  | 237.00 | temperate deciduous forest | [119] |
| 596 | 44.20 | 134.00 | 1.70  | 777.00  | 205.22 | temperate deciduous forest | [120] |
| 597 | 44.30 | 128.50 | 2.20  | 587.00  | 144.40 | temperate deciduous forest | [119] |
| 598 | 44.30 | 129.40 | 3.60  | 555.00  | 202.10 | temperate deciduous forest | [119] |
| 599 | 44.30 | 134.30 | 1.70  | 777.00  | 220.98 | temperate deciduous forest | [120] |
| 600 | 44.50 | 134.50 | 1.50  | 745.00  | 196.48 | temperate deciduous forest | [120] |
| 601 | 44.50 | 142.50 | 5.20  | 1056.00 | 313.40 | temperate deciduous forest | [120] |
| 602 | 45.00 | -77.00 | 4.60  | 835.00  | 278.00 | temperate deciduous forest | [119] |
| 603 | 45.00 | 135.00 | 0.90  | 754.00  | 196.02 | temperate deciduous forest | [120] |
| 604 | 45.28 | 127.52 | 2.70  | 566.00  | 115.13 | temperate deciduous forest | [102] |
| 605 | 46.00 | -66.00 | 4.50  | 1125.00 | 214.00 | temperate deciduous forest | [119] |
| 606 | 46.00 | 4.33   | 10.10 | 855.00  | 330.70 | temperate deciduous forest | [120] |
| 607 | 46.21 | 131.80 | 3.20  | 560.00  | 151.95 | temperate deciduous forest | [119] |
| 608 | 46.80 | 134.00 | 1.90  | 671.00  | 137.45 | temperate deciduous forest | [119] |
| 609 | 47.00 | 129.00 | -2.30 | 616.00  | 91.20  | temperate deciduous forest | [119] |
| 610 | 47.00 | 136.00 | -0.20 | 790.00  | 272.20 | temperate deciduous forest | [120] |
| 611 | 47.22 | 128.77 | -0.60 | 599.00  | 208.05 | temperate deciduous forest | [102] |
| 612 | 47.33 | -94.50 | 4.30  | 631.00  | 189.44 | temperate deciduous forest | [121] |
| 613 | 47.83 | 16.50  | 10.10 | 676.00  | 248.89 | temperate deciduous forest | [120] |
| 614 | 47.98 | 139.00 | -1.70 | 816.00  | 196.10 | temperate deciduous forest | [120] |
| 615 | 48.00 | 12.00  | 8.60  | 851.00  | 384.00 | temperate deciduous forest | [120] |
| 616 | 48.09 | -81.27 | 1.80  | 817.00  | 413.30 | temperate deciduous forest | [119] |
| 617 | 48.10 | 129.30 | -0.80 | 602.00  | 185.60 | temperate deciduous forest | [119] |

|     |       |         |       |         |        |                            |       |
|-----|-------|---------|-------|---------|--------|----------------------------|-------|
| 618 | 48.17 | -89.89  | 2.00  | 733.00  | 260.30 | temperate deciduous forest | [119] |
| 619 | 48.37 | 23.67   | 6.20  | 888.00  | 343.50 | temperate deciduous forest | [119] |
| 620 | 48.40 | 2.70    | 11.60 | 607.00  | 300.90 | temperate deciduous forest | [121] |
| 621 | 48.44 | 23.39   | 8.30  | 795.00  | 223.00 | temperate deciduous forest | [119] |
| 622 | 48.58 | 18.00   | 8.20  | 790.00  | 226.34 | temperate deciduous forest | [120] |
| 623 | 48.58 | 19.08   | 5.60  | 981.00  | 197.90 | temperate deciduous forest | [120] |
| 624 | 48.75 | 6.50    | 9.90  | 723.00  | 237.40 | temperate deciduous forest | [120] |
| 625 | 49.00 | 24.50   | 7.60  | 682.00  | 201.44 | temperate deciduous forest | [120] |
| 626 | 49.03 | -73.96  | 0.50  | 837.00  | 378.80 | temperate deciduous forest | [119] |
| 627 | 49.17 | 23.50   | 7.90  | 746.00  | 318.33 | temperate deciduous forest | [120] |
| 628 | 49.17 | 23.83   | 7.90  | 746.00  | 168.23 | temperate deciduous forest | [120] |
| 629 | 49.23 | 15.37   | 7.30  | 704.00  | 230.03 | temperate deciduous forest | [120] |
| 630 | 49.38 | -114.39 | 1.40  | 780.00  | 217.80 | temperate deciduous forest | [119] |
| 631 | 49.50 | 5.00    | 8.80  | 1155.00 | 129.90 | temperate deciduous forest | [120] |
| 632 | 49.50 | 23.00   | 8.20  | 679.00  | 142.77 | temperate deciduous forest | [120] |
| 633 | 49.57 | 13.95   | 7.50  | 639.00  | 382.50 | temperate deciduous forest | [120] |
| 634 | 49.69 | -96.14  | 2.00  | 541.00  | 554.40 | temperate deciduous forest | [119] |
| 635 | 49.77 | 36.66   | 7.60  | 515.00  | 97.83  | temperate deciduous forest | [120] |
| 636 | 49.98 | 20.37   | 6.90  | 820.00  | 293.30 | temperate deciduous forest | [121] |
| 637 | 50.00 | 15.00   | 8.70  | 640.00  | 248.84 | temperate deciduous forest | [120] |
| 638 | 50.03 | 5.27    | 9.30  | 872.00  | 264.99 | temperate deciduous forest | [120] |
| 639 | 50.07 | 4.35    | 10.10 | 865.00  | 207.08 | temperate deciduous forest | [119] |
| 640 | 50.07 | 32.98   | 7.80  | 593.00  | 170.39 | temperate deciduous forest | [120] |
| 641 | 50.10 | 20.37   | 8.40  | 681.00  | 286.45 | temperate deciduous forest | [120] |
| 642 | 50.17 | 83.39   | 3.20  | 427.00  | 91.65  | temperate deciduous forest | [120] |
| 643 | 50.18 | -114.47 | 1.60  | 652.00  | 375.70 | temperate deciduous forest | [119] |
| 644 | 50.33 | 5.67    | 8.90  | 1045.00 | 249.75 | temperate deciduous forest | [120] |
| 645 | 50.45 | 11.45   | 7.90  | 603.00  | 337.90 | temperate deciduous forest | [119] |
| 646 | 50.83 | 29.00   | 7.40  | 618.00  | 209.37 | temperate deciduous forest | [120] |
| 647 | 50.97 | 26.43   | 7.60  | 570.00  | 131.48 | temperate deciduous forest | [120] |
| 648 | 51.00 | -125.00 | 1.00  | 1343.00 | 196.80 | temperate deciduous forest | [119] |

|     |       |         |       |        |        |                            |       |
|-----|-------|---------|-------|--------|--------|----------------------------|-------|
| 649 | 51.04 | 88.00   | -0.90 | 506.00 | 163.16 | temperate deciduous forest | [120] |
| 650 | 51.10 | -116.00 | -1.90 | 948.00 | 206.10 | temperate deciduous forest | [121] |
| 651 | 51.17 | 5.33    | 10.20 | 795.00 | 278.20 | temperate deciduous forest | [120] |
| 652 | 51.40 | 125.20  | -3.40 | 474.00 | 176.00 | temperate deciduous forest | [119] |
| 653 | 51.45 | 23.74   | 7.90  | 546.00 | 147.40 | temperate deciduous forest | [120] |
| 654 | 51.59 | 34.10   | 6.70  | 588.00 | 166.10 | temperate deciduous forest | [120] |
| 655 | 51.70 | 126.60  | -1.70 | 480.00 | 87.20  | temperate deciduous forest | [119] |
| 656 | 51.75 | 9.06    | 7.90  | 771.00 | 169.20 | temperate deciduous forest | [121] |
| 657 | 51.81 | 9.58    | 8.00  | 722.00 | 312.10 | temperate deciduous forest | [121] |
| 658 | 51.96 | 31.24   | 7.40  | 607.00 | 114.60 | temperate deciduous forest | [120] |
| 659 | 51.97 | 33.94   | 6.80  | 601.00 | 101.30 | temperate deciduous forest | [120] |
| 660 | 52.00 | 89.00   | -1.90 | 482.00 | 143.05 | temperate deciduous forest | [120] |
| 661 | 52.00 | 94.00   | -4.30 | 754.00 | 223.60 | temperate deciduous forest | [119] |
| 662 | 52.00 | 96.00   | -4.00 | 545.00 | 133.94 | temperate deciduous forest | [120] |
| 663 | 52.06 | 95.00   | -6.70 | 684.00 | 140.97 | temperate deciduous forest | [120] |
| 664 | 52.19 | 102.36  | -0.70 | 462.00 | 193.80 | temperate deciduous forest | [119] |
| 665 | 52.50 | 27.83   | 7.00  | 630.00 | 168.10 | temperate deciduous forest | [120] |
| 666 | 52.92 | 89.63   | 0.70  | 472.00 | 184.87 | temperate deciduous forest | [120] |
| 667 | 52.94 | 92.00   | 0.50  | 553.00 | 189.19 | temperate deciduous forest | [120] |
| 668 | 53.00 | 14.00   | 8.70  | 569.00 | 200.80 | temperate deciduous forest | [120] |
| 669 | 53.00 | 122.40  | -5.20 | 428.00 | 139.40 | temperate deciduous forest | [119] |
| 670 | 53.25 | 28.83   | 6.50  | 641.00 | 219.63 | temperate deciduous forest | [120] |
| 671 | 53.30 | 50.20   | 4.80  | 486.00 | 122.70 | temperate deciduous forest | [120] |
| 672 | 53.30 | 57.00   | 1.40  | 444.00 | 132.89 | temperate deciduous forest | [120] |
| 673 | 53.50 | 28.00   | 6.50  | 642.00 | 312.20 | temperate deciduous forest | [120] |
| 674 | 53.50 | 57.00   | 1.20  | 476.00 | 90.31  | temperate deciduous forest | [120] |
| 675 | 54.00 | -115.00 | 1.40  | 523.00 | 278.00 | temperate deciduous forest | [119] |
| 676 | 54.00 | 26.00   | 6.30  | 653.00 | 126.01 | temperate deciduous forest | [120] |
| 677 | 54.00 | 86.00   | 1.30  | 527.00 | 138.70 | temperate deciduous forest | [120] |
| 678 | 54.00 | 90.00   | -1.30 | 511.00 | 185.13 | temperate deciduous forest | [120] |
| 679 | 54.17 | -116.77 | 2.50  | 559.00 | 340.00 | temperate deciduous forest | [119] |

|     |       |         |       |        |        |                            |       |
|-----|-------|---------|-------|--------|--------|----------------------------|-------|
| 680 | 54.42 | 90.00   | -1.30 | 511.00 | 192.91 | temperate deciduous forest | [120] |
| 681 | 55.00 | 89.50   | 0.00  | 477.00 | 141.74 | temperate deciduous forest | [120] |
| 682 | 55.40 | 36.40   | 5.00  | 660.00 | 186.80 | temperate deciduous forest | [120] |
| 683 | 55.50 | 23.60   | 6.50  | 617.00 | 161.09 | temperate deciduous forest | [120] |
| 684 | 55.62 | 64.00   | 2.70  | 320.00 | 108.20 | temperate deciduous forest | [120] |
| 685 | 55.75 | 13.91   | 7.60  | 649.00 | 310.50 | temperate deciduous forest | [121] |
| 686 | 55.99 | 91.35   | -0.10 | 487.00 | 140.50 | temperate deciduous forest | [120] |
| 687 | 56.00 | 13.50   | 7.30  | 698.00 | 331.20 | temperate deciduous forest | [120] |
| 688 | 56.00 | 42.00   | 4.30  | 604.00 | 172.05 | temperate deciduous forest | [120] |
| 689 | 56.00 | 82.50   | 0.40  | 488.00 | 167.00 | temperate deciduous forest | [120] |
| 690 | 56.00 | 90.50   | 0.00  | 463.00 | 175.29 | temperate deciduous forest | [120] |
| 691 | 56.00 | 91.00   | -0.20 | 473.00 | 197.86 | temperate deciduous forest | [120] |
| 692 | 56.17 | 90.83   | 0.00  | 463.00 | 158.83 | temperate deciduous forest | [120] |
| 693 | 56.23 | 90.48   | -0.60 | 405.00 | 151.89 | temperate deciduous forest | [120] |
| 694 | 56.30 | 33.00   | 4.10  | 736.00 | 145.42 | temperate deciduous forest | [120] |
| 695 | 56.34 | 90.15   | -0.80 | 484.00 | 96.46  | temperate deciduous forest | [120] |
| 696 | 56.35 | 57.40   | 2.00  | 573.00 | 183.59 | temperate deciduous forest | [120] |
| 697 | 56.45 | 32.92   | 4.30  | 718.00 | 233.70 | temperate deciduous forest | [119] |
| 698 | 56.48 | 8.40    | 8.40  | 838.00 | 241.60 | temperate deciduous forest | [120] |
| 699 | 56.50 | 33.00   | 4.00  | 749.00 | 257.59 | temperate deciduous forest | [120] |
| 700 | 56.55 | -119.31 | -1.40 | 417.00 | 323.20 | temperate deciduous forest | [119] |
| 701 | 56.65 | 85.00   | 0.40  | 559.00 | 181.45 | temperate deciduous forest | [120] |
| 702 | 56.67 | 57.75   | 1.60  | 593.00 | 143.20 | temperate deciduous forest | [120] |
| 703 | 56.71 | 85.00   | 0.40  | 559.00 | 237.32 | temperate deciduous forest | [120] |
| 704 | 57.00 | 12.50   | 7.00  | 741.00 | 162.60 | temperate deciduous forest | [120] |
| 705 | 57.00 | 83.00   | -0.10 | 502.00 | 172.90 | temperate deciduous forest | [120] |
| 706 | 57.13 | -118.33 | -1.30 | 401.00 | 422.50 | temperate deciduous forest | [119] |
| 707 | 57.40 | 85.00   | 0.00  | 539.00 | 189.30 | temperate deciduous forest | [120] |
| 708 | 57.51 | 30.74   | 7.60  | 570.00 | 269.90 | temperate deciduous forest | [120] |
| 709 | 58.00 | 13.50   | 5.70  | 631.00 | 231.06 | temperate deciduous forest | [120] |
| 710 | 58.00 | 33.00   | 4.10  | 713.00 | 194.30 | temperate deciduous forest | [120] |

|     |       |        |        |        |        |                            |       |
|-----|-------|--------|--------|--------|--------|----------------------------|-------|
| 711 | 59.00 | 26.00  | 4.70   | 666.00 | 207.08 | temperate deciduous forest | [120] |
| 712 | 59.50 | 17.67  | 5.90   | 530.00 | 129.60 | temperate deciduous forest | [120] |
| 713 | 70.92 | 101.00 | -12.80 | 269.00 | 10.80  | boreal forest              | [120] |
| 714 | 65.50 | 60.00  | -4.60  | 488.00 | 12.20  | boreal forest              | [120] |
| 715 | 55.50 | 123.50 | -7.80  | 513.00 | 13.20  | boreal forest              | [120] |
| 716 | 60.00 | 151.00 | -9.10  | 428.00 | 16.68  | boreal forest              | [120] |
| 717 | 57.00 | 59.58  | 1.30   | 598.00 | 16.98  | boreal forest              | [120] |
| 718 | 62.00 | 147.00 | -13.20 | 315.00 | 16.99  | boreal forest              | [120] |
| 719 | 56.00 | 101.00 | -3.30  | 388.00 | 17.60  | boreal forest              | [120] |
| 720 | 68.00 | 33.00  | -0.40  | 538.00 | 18.75  | boreal forest              | [120] |
| 721 | 66.87 | 102.33 | -11.90 | 321.00 | 18.77  | boreal forest              | [119] |
| 722 | 64.00 | 100.00 | -9.80  | 381.00 | 20.15  | boreal forest              | [119] |
| 723 | 63.00 | 151.00 | -14.70 | 331.00 | 21.47  | boreal forest              | [120] |
| 724 | 68.21 | 160.00 | -12.70 | 168.00 | 21.50  | boreal forest              | [119] |
| 725 | 66.50 | 60.00  | -4.70  | 444.00 | 24.05  | boreal forest              | [120] |
| 726 | 55.10 | 125.00 | -6.50  | 537.00 | 24.80  | boreal forest              | [120] |
| 727 | 61.15 | 150.00 | -11.50 | 404.00 | 26.60  | boreal forest              | [120] |
| 728 | 69.29 | 99.50  | -12.10 | 291.00 | 26.80  | boreal forest              | [119] |
| 729 | 60.18 | 15.86  | 3.90   | 642.00 | 28.00  | boreal forest              | [122] |
| 730 | 61.30 | 59.17  | -3.70  | 614.00 | 28.03  | boreal forest              | [120] |
| 731 | 68.73 | 104.33 | -11.60 | 275.00 | 28.55  | boreal forest              | [119] |
| 732 | 57.30 | 41.00  | 4.00   | 597.00 | 28.95  | boreal forest              | [120] |
| 733 | 64.32 | 100.22 | -9.80  | 381.00 | 29.00  | boreal forest              | [119] |
| 734 | 57.33 | 43.00  | 3.90   | 603.00 | 29.10  | boreal forest              | [120] |
| 735 | 69.88 | 135.62 | -16.90 | 171.00 | 29.19  | boreal forest              | [120] |
| 736 | 66.00 | 91.00  | -8.70  | 501.00 | 30.21  | boreal forest              | [120] |
| 737 | 58.50 | 29.11  | 4.80   | 637.00 | 30.70  | boreal forest              | [122] |
| 738 | 66.10 | 67.00  | -4.90  | 414.00 | 31.80  | boreal forest              | [120] |
| 739 | 59.96 | 33.50  | 3.70   | 646.00 | 32.50  | boreal forest              | [122] |
| 740 | 65.00 | 44.00  | -0.20  | 547.00 | 34.80  | boreal forest              | [120] |
| 741 | 65.38 | 34.50  | 1.50   | 587.00 | 36.13  | boreal forest              | [120] |

|     |       |        |        |        |       |               |       |
|-----|-------|--------|--------|--------|-------|---------------|-------|
| 742 | 68.30 | 90.00  | -11.60 | 404.00 | 36.23 | boreal forest | [120] |
| 743 | 57.83 | 43.33  | 3.60   | 602.00 | 36.40 | boreal forest | [120] |
| 744 | 69.58 | 27.02  | -2.50  | 506.00 | 37.00 | boreal forest | [119] |
| 745 | 60.00 | 59.00  | -3.00  | 637.00 | 37.27 | boreal forest | [120] |
| 746 | 58.20 | 82.00  | -0.80  | 501.00 | 37.80 | boreal forest | [120] |
| 747 | 56.25 | 60.10  | 1.40   | 547.00 | 38.15 | boreal forest | [120] |
| 748 | 62.00 | 102.50 | -8.70  | 388.00 | 39.00 | boreal forest | [120] |
| 749 | 67.50 | 87.00  | -8.30  | 478.00 | 39.10 | boreal forest | [120] |
| 750 | 57.50 | 41.00  | 3.90   | 592.00 | 41.00 | boreal forest | [120] |
| 751 | 57.83 | 43.83  | 3.50   | 614.00 | 41.27 | boreal forest | [120] |
| 752 | 59.30 | 60.00  | 0.80   | 566.00 | 41.60 | boreal forest | [120] |
| 753 | 68.00 | 34.00  | -0.50  | 527.00 | 45.20 | boreal forest | [120] |
| 754 | 58.00 | 69.00  | 0.00   | 479.00 | 45.90 | boreal forest | [120] |
| 755 | 56.42 | 60.17  | 1.40   | 547.00 | 46.59 | boreal forest | [120] |
| 756 | 64.17 | 47.67  | -0.80  | 589.00 | 48.61 | boreal forest | [120] |
| 757 | 55.00 | 60.00  | 1.70   | 527.00 | 49.20 | boreal forest | [120] |
| 758 | 57.50 | 60.33  | 1.50   | 575.00 | 51.91 | boreal forest | [120] |
| 759 | 59.67 | 90.00  | -2.20  | 537.00 | 52.20 | boreal forest | [120] |
| 760 | 67.00 | 123.00 | -12.10 | 286.00 | 52.27 | boreal forest | [120] |
| 761 | 59.80 | 14.70  | 4.20   | 704.00 | 52.83 | boreal forest | [120] |
| 762 | 63.12 | 27.75  | 3.10   | 507.00 | 54.50 | boreal forest | [120] |
| 763 | 60.00 | 148.00 | -8.00  | 406.00 | 55.11 | boreal forest | [120] |
| 764 | 60.51 | 23.85  | 4.30   | 559.00 | 55.93 | boreal forest | [121] |
| 765 | 61.10 | 24.08  | 3.80   | 536.00 | 55.93 | boreal forest | [120] |
| 766 | 67.78 | 86.00  | -8.90  | 436.00 | 56.47 | boreal forest | [120] |
| 767 | 68.00 | 92.00  | -12.80 | 459.00 | 58.93 | boreal forest | [120] |
| 768 | 59.00 | 53.00  | 1.40   | 616.00 | 59.18 | boreal forest | [120] |
| 769 | 67.73 | 33.83  | -2.00  | 697.00 | 59.70 | boreal forest | [120] |
| 770 | 64.00 | 13.00  | 1.20   | 840.00 | 62.60 | boreal forest | [120] |
| 771 | 60.82 | 16.50  | 4.40   | 606.00 | 62.78 | boreal forest | [119] |
| 772 | 61.00 | 69.00  | -1.80  | 509.00 | 62.80 | boreal forest | [120] |



|     |       |        |        |        |       |               |       |
|-----|-------|--------|--------|--------|-------|---------------|-------|
| 773 | 66.00 | 28.00  | -0.60  | 566.00 | 63.10 | boreal forest | [120] |
| 774 | 57.00 | 126.30 | -8.40  | 566.00 | 63.20 | boreal forest | [120] |
| 775 | 62.00 | 117.00 | -7.90  | 293.00 | 63.40 | boreal forest | [120] |
| 776 | 62.00 | 89.00  | -3.90  | 554.00 | 63.80 | boreal forest | [120] |
| 777 | 57.00 | 61.00  | 1.90   | 510.00 | 64.91 | boreal forest | [120] |
| 778 | 64.90 | 20.50  | 2.20   | 516.00 | 65.55 | boreal forest | [120] |
| 779 | 58.00 | 97.00  | -2.20  | 405.00 | 66.02 | boreal forest | [120] |
| 780 | 68.00 | 87.00  | -8.70  | 465.00 | 66.03 | boreal forest | [120] |
| 781 | 62.78 | 30.97  | 2.40   | 582.00 | 66.80 | boreal forest | [123] |
| 782 | 58.20 | 125.30 | -7.40  | 545.00 | 67.20 | boreal forest | [120] |
| 783 | 67.00 | 32.00  | -0.70  | 571.00 | 67.38 | boreal forest | [120] |
| 784 | 55.00 | 98.50  | -1.30  | 408.00 | 67.93 | boreal forest | [120] |
| 785 | 60.83 | 16.47  | 3.70   | 632.00 | 68.80 | boreal forest | [120] |
| 786 | 62.78 | 30.96  | 2.40   | 582.00 | 69.40 | boreal forest | [123] |
| 787 | 62.78 | 30.97  | 2.40   | 582.00 | 71.58 | boreal forest | [120] |
| 788 | 56.83 | 48.50  | 3.40   | 573.00 | 71.65 | boreal forest | [120] |
| 789 | 59.50 | 30.58  | 4.70   | 630.00 | 72.07 | boreal forest | [120] |
| 790 | 57.50 | 102.00 | -3.90  | 372.00 | 72.10 | boreal forest | [120] |
| 791 | 68.30 | 90.00  | -11.60 | 404.00 | 73.10 | boreal forest | [119] |
| 792 | 66.30 | 60.00  | -4.10  | 462.00 | 73.82 | boreal forest | [120] |
| 793 | 61.65 | 29.28  | 3.60   | 543.00 | 73.90 | boreal forest | [119] |
| 794 | 57.00 | 59.30  | 1.40   | 620.00 | 75.10 | boreal forest | [120] |
| 795 | 64.50 | 55.50  | -1.80  | 557.00 | 75.49 | boreal forest | [120] |
| 796 | 55.00 | 127.00 | -5.40  | 550.00 | 75.95 | boreal forest | [120] |
| 797 | 63.00 | 152.00 | -12.70 | 315.00 | 78.15 | boreal forest | [120] |
| 798 | 60.00 | 40.00  | 2.10   | 629.00 | 78.43 | boreal forest | [120] |
| 799 | 62.15 | 117.20 | -7.90  | 293.00 | 78.80 | boreal forest | [120] |
| 800 | 63.67 | 43.00  | 0.60   | 601.00 | 78.91 | boreal forest | [120] |
| 801 | 60.00 | 150.00 | -8.20  | 424.00 | 79.37 | boreal forest | [120] |
| 802 | 61.00 | 87.00  | -3.20  | 555.00 | 79.66 | boreal forest | [120] |
| 803 | 62.42 | 92.33  | -5.60  | 558.00 | 80.05 | boreal forest | [120] |

|     |       |        |       |        |       |               |       |
|-----|-------|--------|-------|--------|-------|---------------|-------|
| 804 | 67.50 | 35.00  | -0.50 | 531.00 | 80.09 | boreal forest | [120] |
| 805 | 65.50 | 90.00  | -7.90 | 530.00 | 80.80 | boreal forest | [120] |
| 806 | 57.30 | 60.20  | 1.90  | 559.00 | 81.03 | boreal forest | [120] |
| 807 | 57.70 | 38.57  | 3.90  | 627.00 | 82.57 | boreal forest | [120] |
| 808 | 62.00 | 118.00 | -8.00 | 288.00 | 82.70 | boreal forest | [120] |
| 809 | 59.50 | 60.00  | 0.20  | 547.00 | 85.60 | boreal forest | [120] |
| 810 | 62.07 | 24.57  | 3.50  | 515.00 | 85.68 | boreal forest | [120] |
| 811 | 59.17 | 36.00  | 3.40  | 697.00 | 86.16 | boreal forest | [120] |
| 812 | 67.30 | 86.00  | -7.40 | 487.00 | 86.50 | boreal forest | [120] |
| 813 | 56.75 | 48.00  | 3.50  | 577.00 | 86.70 | boreal forest | [120] |
| 814 | 54.33 | 58.67  | 0.10  | 481.00 | 87.18 | boreal forest | [120] |
| 815 | 60.27 | 11.10  | 4.40  | 731.00 | 87.20 | boreal forest | [120] |
| 816 | 68.50 | 34.00  | -0.40 | 519.00 | 87.93 | boreal forest | [120] |
| 817 | 66.00 | 88.00  | -7.30 | 524.00 | 88.00 | boreal forest | [120] |
| 818 | 62.50 | 88.00  | -4.20 | 561.00 | 88.60 | boreal forest | [120] |
| 819 | 55.00 | 123.00 | -7.00 | 481.00 | 88.77 | boreal forest | [120] |
| 820 | 56.00 | -94.00 | -4.40 | 492.00 | 89.80 | boreal forest | [119] |
| 821 | 64.72 | 26.02  | 1.90  | 514.00 | 89.80 | boreal forest | [119] |
| 822 | 61.50 | 41.00  | 1.60  | 621.00 | 90.28 | boreal forest | [120] |
| 823 | 67.65 | 31.08  | -1.20 | 613.00 | 90.38 | boreal forest | [120] |
| 824 | 61.00 | 42.50  | 2.20  | 579.00 | 91.13 | boreal forest | [120] |
| 825 | 51.00 | 105.00 | -3.90 | 636.00 | 91.30 | boreal forest | [120] |
| 826 | 53.97 | 109.37 | -4.00 | 371.00 | 91.57 | boreal forest | [120] |
| 827 | 62.00 | 87.00  | -4.00 | 556.00 | 92.25 | boreal forest | [120] |
| 828 | 59.50 | 90.00  | -2.20 | 537.00 | 94.27 | boreal forest | [120] |
| 829 | 55.88 | 98.20  | -1.60 | 423.00 | 94.43 | boreal forest | [124] |
| 830 | 55.80 | -97.87 | -3.00 | 488.00 | 94.95 | boreal forest | [119] |
| 831 | 64.00 | 42.00  | 0.70  | 586.00 | 95.30 | boreal forest | [120] |
| 832 | 57.00 | 61.17  | 1.90  | 510.00 | 96.07 | boreal forest | [120] |
| 833 | 65.37 | 78.00  | -6.50 | 419.00 | 97.92 | boreal forest | [120] |
| 834 | 62.85 | 30.97  | 2.40  | 582.00 | 99.40 | boreal forest | [119] |

|     |       |         |        |        |        |               |       |
|-----|-------|---------|--------|--------|--------|---------------|-------|
| 835 | 63.00 | 144.72  | -18.30 | 297.00 | 100.00 | boreal forest | [121] |
| 836 | 64.00 | 100.00  | -9.80  | 381.00 | 100.00 | boreal forest | [121] |
| 837 | 68.21 | 160.00  | -12.70 | 168.00 | 100.00 | boreal forest | [121] |
| 838 | 57.00 | 125.00  | -7.80  | 548.00 | 100.50 | boreal forest | [120] |
| 839 | 57.67 | 38.17   | 4.00   | 641.00 | 100.60 | boreal forest | [120] |
| 840 | 67.00 | 33.00   | -0.80  | 576.00 | 100.87 | boreal forest | [120] |
| 841 | 63.30 | 38.40   | 1.60   | 656.00 | 101.04 | boreal forest | [120] |
| 842 | 64.00 | 48.00   | -0.70  | 577.00 | 101.10 | boreal forest | [120] |
| 843 | 61.00 | 76.00   | -2.70  | 522.00 | 101.70 | boreal forest | [120] |
| 844 | 61.13 | 24.00   | 3.80   | 536.00 | 103.27 | boreal forest | [120] |
| 845 | 59.00 | 99.00   | -4.10  | 382.00 | 104.20 | boreal forest | [120] |
| 846 | 60.85 | 128.27  | -9.70  | 336.00 | 105.04 | boreal forest | [120] |
| 847 | 66.00 | 20.00   | -0.80  | 526.00 | 105.65 | boreal forest | [121] |
| 848 | 61.42 | 21.63   | 4.70   | 543.00 | 106.05 | boreal forest | [120] |
| 849 | 62.50 | 41.00   | 1.40   | 612.00 | 106.32 | boreal forest | [120] |
| 850 | 64.75 | -148.25 | -2.90  | 301.00 | 107.78 | boreal forest | [121] |
| 851 | 65.50 | 57.50   | -3.00  | 520.00 | 108.37 | boreal forest | [120] |
| 852 | 57.00 | 62.00   | 2.00   | 479.00 | 108.38 | boreal forest | [120] |
| 853 | 56.00 | 125.00  | -7.90  | 562.00 | 108.70 | boreal forest | [120] |
| 854 | 59.00 | 93.00   | -3.80  | 535.00 | 108.85 | boreal forest | [120] |
| 855 | 62.67 | 40.42   | 1.50   | 638.00 | 109.83 | boreal forest | [120] |
| 856 | 58.30 | 99.30   | -3.20  | 370.00 | 111.60 | boreal forest | [120] |
| 857 | 52.25 | 113.00  | -3.00  | 356.00 | 112.96 | boreal forest | [120] |
| 858 | 63.50 | 38.67   | 1.70   | 626.00 | 113.46 | boreal forest | [120] |
| 859 | 57.00 | 63.00   | 1.70   | 461.00 | 113.90 | boreal forest | [120] |
| 860 | 51.00 | 105.46  | -2.90  | 556.00 | 114.07 | boreal forest | [120] |
| 861 | 64.00 | 99.00   | -10.20 | 405.00 | 114.29 | boreal forest | [120] |
| 862 | 62.30 | 88.00   | -4.00  | 556.00 | 115.85 | boreal forest | [120] |
| 863 | 66.00 | 90.00   | -8.70  | 522.00 | 116.97 | boreal forest | [120] |
| 864 | 66.00 | 53.00   | -2.30  | 498.00 | 117.08 | boreal forest | [120] |
| 865 | 59.00 | 91.00   | -2.00  | 521.00 | 118.88 | boreal forest | [120] |

|     |       |         |        |        |        |               |       |
|-----|-------|---------|--------|--------|--------|---------------|-------|
| 866 | 61.50 | 45.00   | 1.30   | 593.00 | 119.64 | boreal forest | [120] |
| 867 | 63.30 | 42.00   | 1.30   | 582.00 | 120.40 | boreal forest | [120] |
| 868 | 54.00 | 95.00   | -5.00  | 653.00 | 121.97 | boreal forest | [120] |
| 869 | 53.19 | 93.15   | -0.40  | 707.00 | 122.20 | boreal forest | [120] |
| 870 | 66.50 | 48.00   | -1.90  | 487.00 | 123.50 | boreal forest | [120] |
| 871 | 62.28 | 50.67   | 0.70   | 583.00 | 123.67 | boreal forest | [120] |
| 872 | 57.00 | 95.00   | -0.70  | 420.00 | 123.77 | boreal forest | [120] |
| 873 | 57.00 | 59.00   | 1.40   | 620.00 | 124.25 | boreal forest | [120] |
| 874 | 60.00 | 91.00   | -4.80  | 579.00 | 124.54 | boreal forest | [120] |
| 875 | 62.00 | 33.00   | 2.40   | 584.00 | 125.51 | boreal forest | [120] |
| 876 | 55.99 | -98.99  | -2.90  | 461.00 | 125.87 | boreal forest | [119] |
| 877 | 53.92 | -104.68 | 0.10   | 454.00 | 126.30 | boreal forest | [119] |
| 878 | 62.00 | 102.00  | -8.40  | 384.00 | 126.30 | boreal forest | [120] |
| 879 | 62.17 | 40.17   | 1.70   | 630.00 | 126.43 | boreal forest | [120] |
| 880 | 62.00 | 34.00   | 2.40   | 567.00 | 128.43 | boreal forest | [121] |
| 881 | 66.36 | 20.00   | -0.80  | 526.00 | 128.50 | boreal forest | [121] |
| 882 | 66.37 | 29.25   | -0.70  | 553.00 | 128.50 | boreal forest | [120] |
| 883 | 60.30 | 148.00  | -8.00  | 406.00 | 128.90 | boreal forest | [120] |
| 884 | 62.20 | 155.27  | -12.60 | 351.00 | 129.15 | boreal forest | [120] |
| 885 | 66.37 | 29.33   | -0.70  | 553.00 | 129.20 | boreal forest | [119] |
| 886 | 60.75 | 89.41   | -2.90  | 549.00 | 130.08 | boreal forest | [119] |
| 887 | 57.10 | 128.00  | -9.30  | 528.00 | 130.90 | boreal forest | [120] |
| 888 | 64.00 | 33.00   | 0.90   | 572.00 | 131.47 | boreal forest | [120] |
| 889 | 55.17 | 126.00  | -6.80  | 561.00 | 133.50 | boreal forest | [120] |
| 890 | 62.00 | 50.50   | 0.70   | 583.00 | 135.00 | boreal forest | [120] |
| 891 | 56.33 | 160.67  | -5.70  | 682.00 | 135.70 | boreal forest | [120] |
| 892 | 60.30 | 121.00  | -6.70  | 325.00 | 136.38 | boreal forest | [120] |
| 893 | 62.50 | 132.00  | -11.90 | 266.00 | 136.95 | boreal forest | [120] |
| 894 | 66.00 | 87.00   | -6.70  | 517.00 | 137.00 | boreal forest | [119] |
| 895 | 66.37 | 29.00   | -0.70  | 553.00 | 137.05 | boreal forest | [119] |
| 896 | 63.67 | 42.00   | 1.00   | 585.00 | 139.23 | boreal forest | [120] |

|     |       |         |        |         |        |               |       |
|-----|-------|---------|--------|---------|--------|---------------|-------|
| 897 | 63.00 | 129.00  | -10.90 | 263.00  | 139.60 | boreal forest | [120] |
| 898 | 55.00 | 58.00   | 1.80   | 536.00  | 140.07 | boreal forest | [120] |
| 899 | 58.00 | 59.00   | 0.70   | 667.00  | 140.10 | boreal forest | [120] |
| 900 | 62.00 | 92.00   | -5.60  | 558.00  | 140.51 | boreal forest | [120] |
| 901 | 56.00 | 160.00  | -4.80  | 670.00  | 140.80 | boreal forest | [120] |
| 902 | 59.00 | 61.00   | 0.80   | 532.00  | 141.12 | boreal forest | [120] |
| 903 | 61.10 | 73.00   | -2.50  | 533.00  | 141.20 | boreal forest | [120] |
| 904 | 59.50 | 13.00   | 4.80   | 680.00  | 143.40 | boreal forest | [120] |
| 905 | 49.20 | 110.00  | -4.30  | 376.00  | 143.75 | boreal forest | [120] |
| 906 | 62.16 | 14.83   | 1.60   | 601.00  | 144.00 | boreal forest | [121] |
| 907 | 59.40 | 30.25   | 4.80   | 639.00  | 145.78 | boreal forest | [120] |
| 908 | 57.00 | 96.00   | -1.40  | 418.00  | 147.00 | boreal forest | [120] |
| 909 | 54.16 | -101.26 | -0.70  | 450.00  | 149.95 | boreal forest | [119] |
| 910 | 62.00 | 89.00   | -3.90  | 554.00  | 150.50 | boreal forest | [120] |
| 911 | 55.90 | -98.47  | -3.10  | 480.00  | 151.00 | boreal forest | [119] |
| 912 | 61.00 | 88.00   | -3.20  | 553.00  | 154.54 | boreal forest | [120] |
| 913 | 59.00 | 34.00   | 3.30   | 726.00  | 154.83 | boreal forest | [120] |
| 914 | 62.00 | 51.00   | 0.50   | 584.00  | 154.90 | boreal forest | [120] |
| 915 | 53.99 | -104.99 | 0.10   | 454.00  | 155.77 | boreal forest | [119] |
| 916 | 60.50 | 148.00  | -10.50 | 390.00  | 155.83 | boreal forest | [120] |
| 917 | 58.10 | 39.00   | 3.60   | 608.00  | 157.09 | boreal forest | [120] |
| 918 | 55.50 | 59.50   | 1.20   | 569.00  | 157.18 | boreal forest | [120] |
| 919 | 47.85 | -68.33  | 2.10   | 1103.00 | 159.14 | boreal forest | [121] |
| 920 | 56.00 | 105.00  | -5.30  | 388.00  | 159.76 | boreal forest | [120] |
| 921 | 56.67 | 48.17   | 3.50   | 577.00  | 167.54 | boreal forest | [120] |
| 922 | 59.67 | 62.50   | 0.30   | 511.00  | 168.20 | boreal forest | [120] |
| 923 | 60.30 | 56.00   | 0.80   | 677.00  | 168.37 | boreal forest | [120] |
| 924 | 64.67 | 47.50   | -0.90  | 581.00  | 169.55 | boreal forest | [119] |
| 925 | 59.50 | 44.00   | 2.30   | 622.00  | 171.09 | boreal forest | [120] |
| 926 | 60.00 | 90.00   | -2.60  | 549.00  | 172.76 | boreal forest | [120] |
| 927 | 57.00 | 60.50   | 2.00   | 529.00  | 174.70 | boreal forest | [120] |

|     |       |        |       |        |        |               |       |
|-----|-------|--------|-------|--------|--------|---------------|-------|
| 928 | 59.67 | 31.00  | 4.60  | 619.00 | 176.38 | boreal forest | [120] |
| 929 | 51.00 | -82.00 | -0.80 | 649.00 | 176.90 | boreal forest | [119] |
| 930 | 56.50 | 47.00  | 4.00  | 565.00 | 178.40 | boreal forest | [120] |
| 931 | 56.75 | 45.00  | 4.10  | 583.00 | 178.86 | boreal forest | [120] |
| 932 | 57.00 | 93.00  | -0.20 | 470.00 | 181.86 | boreal forest | [120] |
| 933 | 57.17 | 97.83  | -1.70 | 402.00 | 185.55 | boreal forest | [120] |

---

MAT, Mean Annual Temperature; MAP, Mean Annual Precipitation
